# Supplementary material for: Accuracy and hallucination of DeepSeek and ChatGPT in scientific figure interpretation and reference retrieval
Source: Research Square preprint supplement (doi:10.21203/rs.3.rs-6676676/v1), 2025-06-23
Supplement: Supplementary file 1 [file ae59372aa7b090ce37daead0.pdf]

| Question | Title                                                                                                                     |
|----------|---------------------------------------------------------------------------------------------------------------------------|
| Q1       | The role of B7H3 in regulating glucose metabolism                                                                         |
| Q2       | HSF1 plays an important role in tumor cell survival, poor prognosis, and metastasis through several mechanisms            |
| Q3       | A model illustrating Hsp60's regulation of breast cancer                                                                  |
| Q4       | Schematic representation of p53-mediated DNA Damage Response                                                              |
| Q5       | Mechanisms of copper-induced cell death                                                                                   |
| Q6       | Key non-apoptotic regulated cell death pathways                                                                           |
| Q7       | The heat shock response and the regulator of HSF1                                                                         |
| Q8       | B7-H3 non-immune-mediated and immune-mediated signaling pathways                                                          |
| Q9       | Carboplatin, HSF1 and Autophagy                                                                                           |
| Q10      | An Overview of Ferroptosis                                                                                                |
| Q11      | Three hallmarks of ferroptosis                                                                                            |
| Q12      | Mechanisms of MST4-induced Tumor Progression and Treatment Resistance                                                     |
| Q13      | Metabolic reprogramming induced by genetic alterations and interactions with the tumor microenvironment in thyroid cancer |
| Q14      | Proposed mechanisms to show the correlation between the lung and gut in lung cancer mice                                  |
| Q15      | Mechanisms of drugs resistance in breast cancer                                                                           |

This is a picture of " The role of B7H3 in regulating glucose metabolism "  
Please give a suitable interpretation of this picture

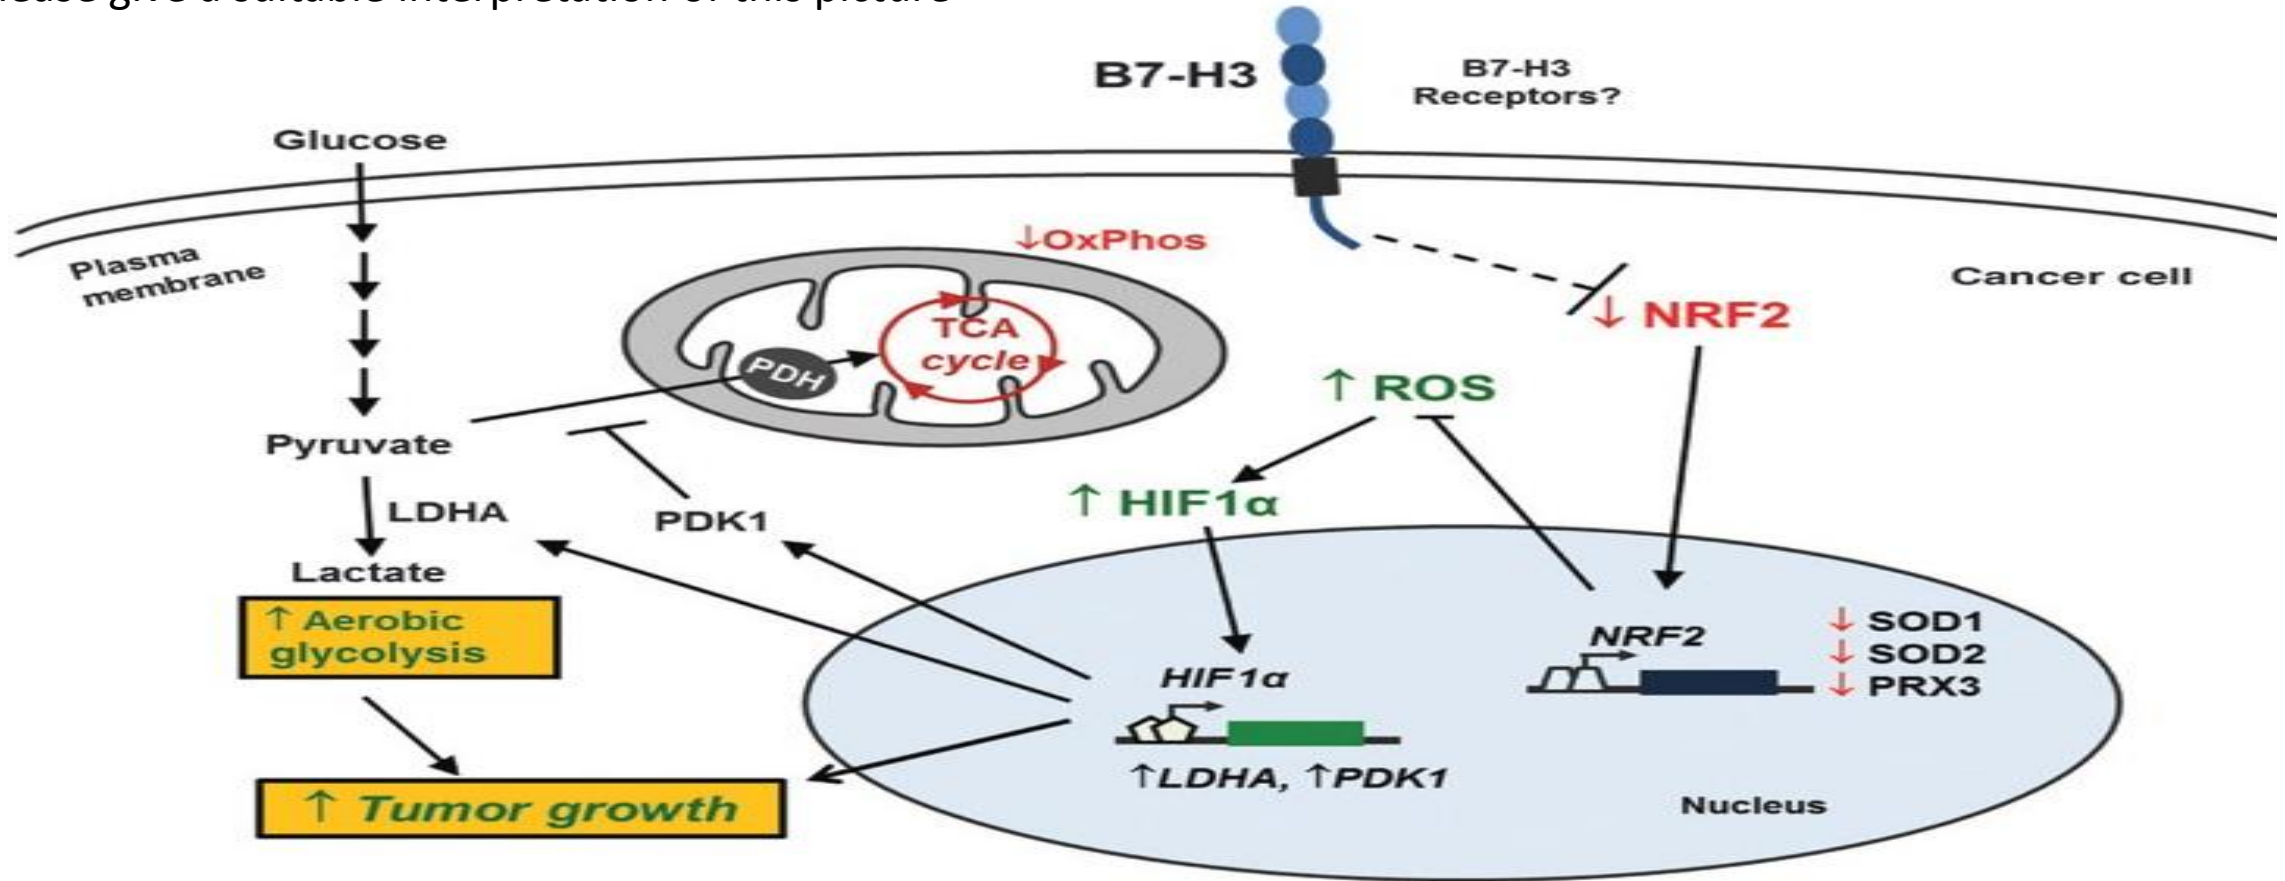

(Explanation from the original article)

Model for the role of B7-H3 regulating glucose metabolism. Through unknown mechanisms, B7-H3 suppresses Nrf2 transcriptional activity, which in turn reduces transcription of the antioxidant enzymes SOD1, SOD2, and PRX3. As a result, B7-H3 overexpression leads to increased ROS in cancer cells. B7-H3-induced ROS stabilizes HIF1a, thus increasing the expression of glycolytic enzymes LDHA and PDK1, which promotes pyruvate conversion into lactate while inhibiting pyruvate flux through the TCA cycle. As a result, B7-H3 promotes aerobic glycolysis in cancer cells and therefore tumor growth

The image titled "The role of B7H3 in regulating glucose metabolism" appears to depict the molecular mechanisms by which B7-H3 influences glucose metabolism in cancer cells. Here's a suitable interpretation of the key elements and processes illustrated in the image:

1. **B7-H3**: This is a protein that is overexpressed in many cancer cells. It plays a role in regulating glucose metabolism, which is crucial for cancer cell survival and proliferation.
2. **Glucose Uptake**: Cancer cells take up glucose from the plasma, which is then metabolized through glycolysis.
3. **Glycolysis**: This is the process by which glucose is broken down to produce energy. In cancer cells, glycolysis is often upregulated, even in the presence of oxygen (a phenomenon known as the Warburg effect).
4. **Pyruvate**: The end product of glycolysis, which can be converted into lactate by the enzyme LDHA (Lactate Dehydrogenase A) or enter the mitochondria for further processing in the TCA cycle.
5. **LDHA and PDK1**: These enzymes are upregulated in cancer cells. LDHA converts pyruvate to lactate, while PDK1 (Pyruvate Dehydrogenase Kinase 1) inhibits the conversion of pyruvate into acetyl-CoA, thereby promoting lactate production and reducing mitochondrial respiration.

6. **HIF1 $\alpha$** : Hypoxia-Inducible Factor 1-alpha is a transcription factor that is stabilized under low oxygen conditions. It promotes the expression of genes involved in glycolysis, such as LDHA and PDK1, further enhancing glycolytic flux.

7. **Lactate**: The production of lactate is a hallmark of cancer metabolism. It is associated with tumor growth and metastasis.

8. **ROS (Reactive Oxygen Species)**: Increased glycolysis and mitochondrial dysfunction can lead to elevated ROS levels, which can further stabilize HIF1 $\alpha$  and promote tumor growth.

9. **NRF2**: Nuclear factor erythroid 2-related factor 2 is a transcription factor that regulates the expression of antioxidant proteins, protecting the cell from oxidative stress. It may interact with HIF1 $\alpha$  to modulate the metabolic adaptation of cancer cells.

10. **Tumor Growth**: The overall effect of these metabolic changes is increased tumor growth, as cancer cells adapt to their environment by optimizing glucose metabolism for rapid proliferation.

In summary, the image illustrates how B7-H3 influences glucose metabolism in cancer cells by upregulating key enzymes and transcription factors involved in glycolysis, leading to increased lactate production, reduced mitochondrial respiration, and ultimately promoting tumor growth.

The provided diagram illustrates the role of **B7-H3** in regulating glucose metabolism in cancer cells. Here's an interpretation of the key components:

### 1. B7-H3 Expression & Impact on Metabolism

- B7-H3 is a transmembrane protein expressed on the plasma membrane of cancer cells.
- The downstream receptor(s) of B7-H3 are still uncertain (indicated by "?").
- B7-H3 inhibits **NRF2** expression, a key regulator of antioxidant defense.

### 2. Metabolic Shift: Warburg Effect (Aerobic Glycolysis)

- B7-H3 downregulates **oxidative phosphorylation (OxPhos)** and the **TCA cycle**, which are mitochondrial processes essential for efficient ATP production.
- Instead, it promotes **aerobic glycolysis**, a hallmark of cancer metabolism, leading to:
- Increased **lactate production** via **LDHA (lactate dehydrogenase A)**.
- Increased **PDK1 (pyruvate dehydrogenase kinase 1)**, which inhibits pyruvate entry into the TCA cycle.
- Increased **HIF1 $\alpha$  (Hypoxia-Inducible Factor 1-alpha)**, which further enhances glycolysis.

### 3. Effects on Reactive Oxygen Species (ROS) and Antioxidant Defense

- Increased glycolysis leads to **elevated ROS (Reactive Oxygen Species)**.
- **HIF1 $\alpha$**  is upregulated, which can further contribute to metabolic reprogramming.
- **NRF2 suppression** reduces the expression of antioxidant enzymes like **SOD1, SOD2, and PRX3**, making the cancer cells more susceptible to oxidative stress.

### 4. Cancer Progression

- The metabolic shift towards glycolysis provides cancer cells with rapid ATP production and biosynthetic intermediates, fueling **tumor growth**.
- The inhibition of **NRF2-mediated antioxidant defense** might create an environment where ROS levels are high, promoting mutations and further cancer progression.

### Conclusion

The diagram suggests that **B7-H3 plays a critical role in reprogramming glucose metabolism in cancer cells**, favoring glycolysis over mitochondrial respiration. This metabolic shift supports **tumor growth and progression** by enhancing HIF1 $\alpha$  activity while suppressing NRF2-dependent antioxidant pathways. Targeting B7-H3 could be a potential therapeutic strategy to disrupt cancer metabolism.

This is a picture of " HSF1 plays an important role in tumor cell survival, poor prognosis, and metastasis through several mechanisms "

Please give a suitable interpretation of this picture

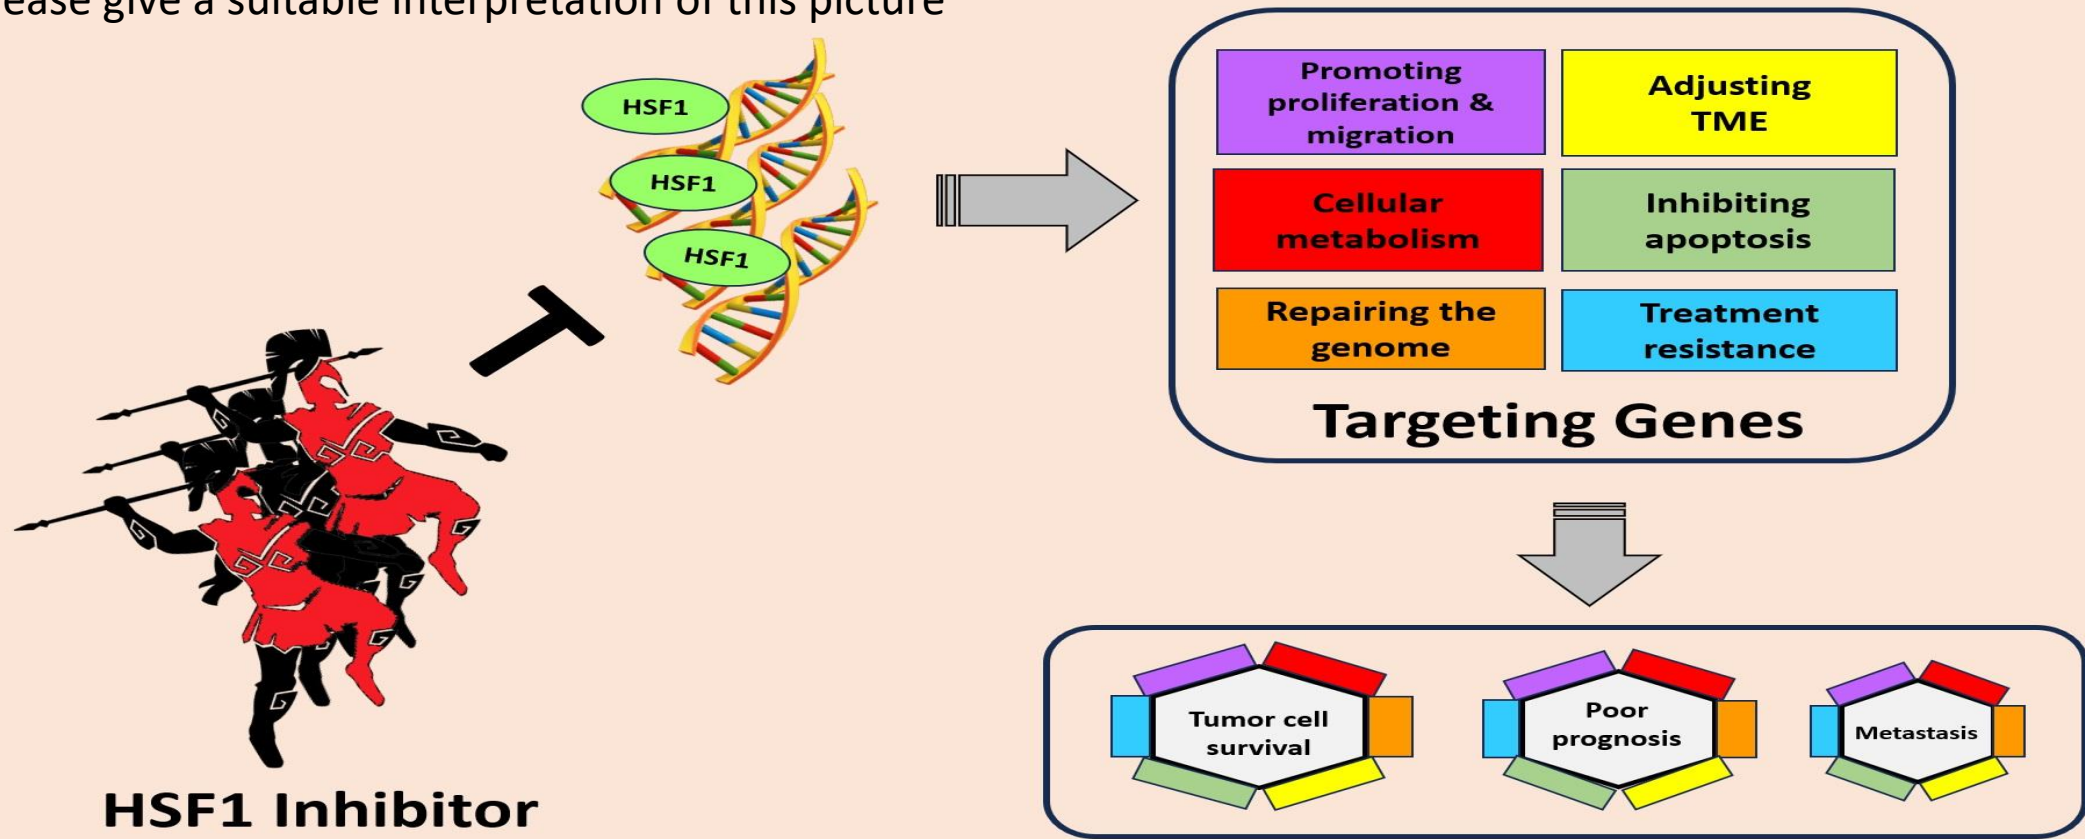

(Explanation from the original article)

HSF1 plays an important role in tumor cell survival, poor prognosis, and metastasis through several mechanisms. HSF1 can increase the expression of genes involved in anti-apoptotic mechanisms, cellular metabolism, promoting migration, and even drug resistance. By inhibiting HSF1, cancer progression can be suppressed and provide better hope to patients

The image titled "HSF1 Warrior" illustrates the multifaceted role of HSF1 (Heat Shock Factor 1) in tumor biology. HSF1 is depicted as a central player influencing various aspects of tumor cell behavior and the tumor microenvironment (TME). Here's a breakdown of the key elements:

1. **Promoting Tumor Cell Survival:** HSF1 supports tumor cell survival by inhibiting apoptosis (programmed cell death) and adjusting cellular metabolism to favor tumor growth.
2. **Enhancing Proliferation and Migration:** HSF1 promotes the proliferation (rapid growth) and migration (spread) of tumor cells, contributing to cancer progression.
3. **Repairing the Genome:** HSF1 aids in DNA repair mechanisms, which can help tumor cells survive despite genetic damage.
4. **Treatment Resistance:** By facilitating these survival mechanisms, HSF1 contributes to resistance against cancer treatments, making tumors harder to eradicate.

5. **Poor Prognosis and Metastasis:** The activities of HSF1 are linked to poor patient prognosis and increased metastasis (spread of cancer to other parts of the body).
6. **Targeting HSF1:** The image suggests that inhibiting HSF1 could be a potential therapeutic strategy to counteract its tumor-promoting effects.

In summary, the image highlights HSF1 as a critical factor in tumor survival, progression, and resistance to therapy, making it a potential target for cancer treatment.

## Interpretation of the Image: The Role of HSF1 in Tumor Progression and Its Inhibition

This image represents the critical role of **Heat Shock Factor 1 (HSF1)** in tumor cell survival, poor prognosis, and metastasis. The diagram is structured into different sections, illustrating the molecular mechanisms through which HSF1 supports cancer progression and the potential impact of its inhibition.

### Key Elements of the Image:

#### 1.HSF1 Activation and Binding to DNA

- The green **HSF1** molecules are shown binding to DNA, indicating that HSF1 regulates the expression of genes involved in cancer progression.
- HSF1 acts as a transcription factor, activating genes responsible for various tumor-promoting functions.

#### 2.HSF1-Regulated Genes and Their Functions

- The box labeled "**Targeting Genes**" lists key biological processes influenced by HSF1:
  - **Promoting proliferation & migration** (Purple)
  - **Adjusting the Tumor Microenvironment (TME)** (Yellow)
  - **Cellular metabolism** (Red)
  - **Inhibiting apoptosis (cell death)** (Green)
  - **Repairing the genome** (Orange)
  - **Treatment resistance** (Blue)
- These functions suggest that HSF1 enhances cancer cell survival, adaptability, and resistance to therapies.

#### 3.HSF1's Role in Cancer Progression

- The bottom section highlights **three major cancer-related consequences of HSF1 activation**:
  - **Tumor cell survival**
  - **Poor prognosis**
  - **Metastasis**
- These outcomes align with the gene regulation functions listed above, demonstrating how HSF1 supports aggressive tumor behavior.

#### 4.HSF1 Inhibition as a Therapeutic Strategy

- The left side of the image depicts **HSF1 inhibition** as a battle between HSF1 and inhibitors (represented as warriors).
- Blocking HSF1 prevents it from binding to DNA, thereby **disrupting tumor-promoting pathways** and potentially improving patient outcomes.

### Conclusion:

HSF1 is a crucial driver of tumor progression through various mechanisms, including genome repair, apoptosis inhibition, and metabolic support. By targeting genes that enhance survival, metastasis, and therapy resistance, HSF1 contributes to poor prognosis in cancer. The concept of **HSF1 inhibition** is presented as a promising strategy to disrupt these pathways and hinder cancer growth.

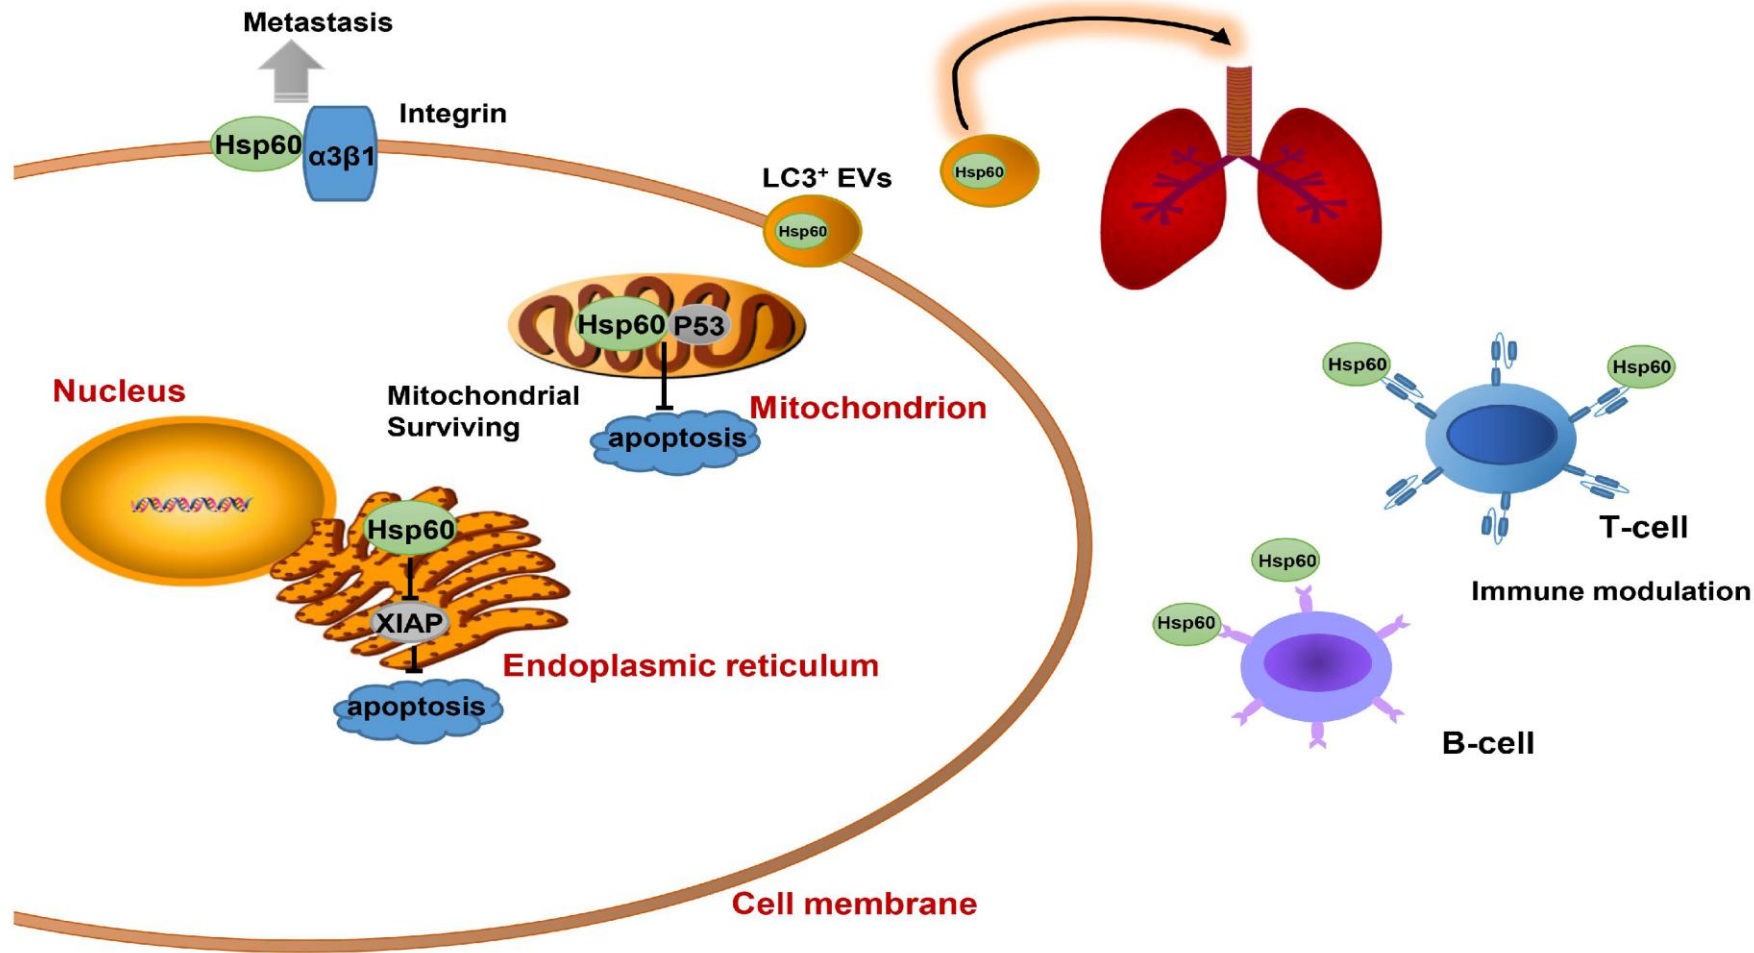

This is a picture of "A model illustrating Hsp60's regulation of breast cancer"

Please give a suitable interpretation of this picture

(Explanation from the original article)

Hsp60 in the endoplasmic reticulum inhibits XIAP expression to confer resistance to apoptosis. Mitochondrial Hsp60 interacts with P53 to suppress P53-dependent apoptosis. Hsp60 on the cell membrane interacts with  $\alpha 3 \beta 1$ -integrin to promote metastasis. Extracellular Hsp60 acts as an antigen for B-cells and T-cells to modulate the immune system in early stages of breast cancer. Exosomal Hsp60 in plasma accelerates the lung metastasis of breast cancer.



The image titled "A model illustrating Hsp60's regulation of breast cancer" likely depicts the role of the heat shock protein 60 (Hsp60) in the context of breast cancer progression and metastasis. Here's a possible interpretation based on the provided terms:

1. **Hsp60 and Cancer Regulation:** Hsp60 is shown to play a significant role in breast cancer. It may be involved in regulating cellular processes that contribute to cancer progression, such as cell survival, apoptosis (programmed cell death), and immune modulation.
2. **Cellular Components:** The model includes various cellular components like the nucleus, mitochondria, endoplasmic reticulum, and cell membrane. These components are crucial for understanding how Hsp60 interacts within the cell to influence cancer behavior.
3. **Apoptosis and Survival:** Hsp60 is associated with both apoptosis and survival mechanisms. It may interact with proteins like XIAP (X-linked inhibitor of apoptosis) and p53, which are key regulators of cell death and survival. This dual role could be critical in determining whether cancer cells survive or undergo apoptosis.
4. **Immune Modulation:** Hsp60 might influence the immune system's response to cancer cells, potentially modulating the activity of T-cells and B-cells. This could affect how the immune system targets and eliminates cancer cells.
5. **Metastasis and Integrin:** The model may also illustrate how Hsp60, along with integrins, plays a role in metastasis—the spread of cancer cells to other parts of the body. Integrins are cell surface receptors that mediate interactions between cells and their environment, which is crucial for cancer cell migration and invasion.
6. **LG3 EVs:** This term might refer to extracellular vesicles (EVs) containing LG3, which could be involved in cell communication and the spread of cancer-related signals.

Overall, the image likely represents a complex network of interactions involving Hsp60 that contribute to the regulation of breast cancer at multiple levels, including cellular survival, immune response, and metastasis.

## Interpretation of the Image:

### Hsp60's Role in Breast Cancer Regulation

The image presents a model illustrating how **Heat Shock Protein 60 (Hsp60)** contributes to breast cancer regulation through multiple cellular pathways. It highlights **Hsp60's involvement in apoptosis, immune modulation, mitochondrial survival, and metastasis**. Below is a breakdown of its different roles:

#### 1. Hsp60 in Metastasis and Cell Membrane Signaling

- **Hsp60 associates with Integrin ( $\alpha3\beta1$ )** on the **cell membrane**, promoting **metastasis**.
- This interaction suggests that Hsp60 may facilitate **cancer cell migration** and invasion, aiding in tumor spread.

#### 2. Hsp60 in Mitochondrial Regulation and Apoptosis

- Hsp60 interacts with **p53** in the **mitochondrion**, influencing **apoptosis**.
- This suggests Hsp60 may have a role in modulating cell survival and death, potentially **protecting cancer cells** from apoptosis.

#### 3. Hsp60 in Endoplasmic Reticulum (ER) and Apoptosis Suppression

**Hsp60 interacts with XIAP** (X-linked inhibitor of apoptosis protein) in the **endoplasmic reticulum (ER)**.

XIAP is known to **inhibit apoptosis**, indicating that Hsp60 may contribute to the survival of cancer cells by preventing programmed cell death.

#### 4. Hsp60 in Extracellular Vesicles (EVs) and Lung Metastasis

- **LC3+ Extracellular Vesicles (EVs)** carrying **Hsp60** can be transported to distant organs (such as the **lungs**).
- This suggests a potential mechanism for **lung metastasis**, where Hsp60 might play a role in cancer progression beyond the primary tumor site.

#### 5. Hsp60 in Immune Modulation

- Hsp60 is depicted as being **recognized by immune cells**, including **T-cells and B-cells**.
- This suggests that Hsp60 may have a role in **immune modulation**, possibly influencing how the immune system interacts with cancer cells.

### Conclusion

This model highlights **Hsp60 as a multifaceted regulator** in breast cancer. It plays a **dual role**—protecting cancer cells from apoptosis while also contributing to metastasis and immune system interactions. These insights suggest that **Hsp60 could be a potential target for therapeutic strategies** in breast cancer treatment.

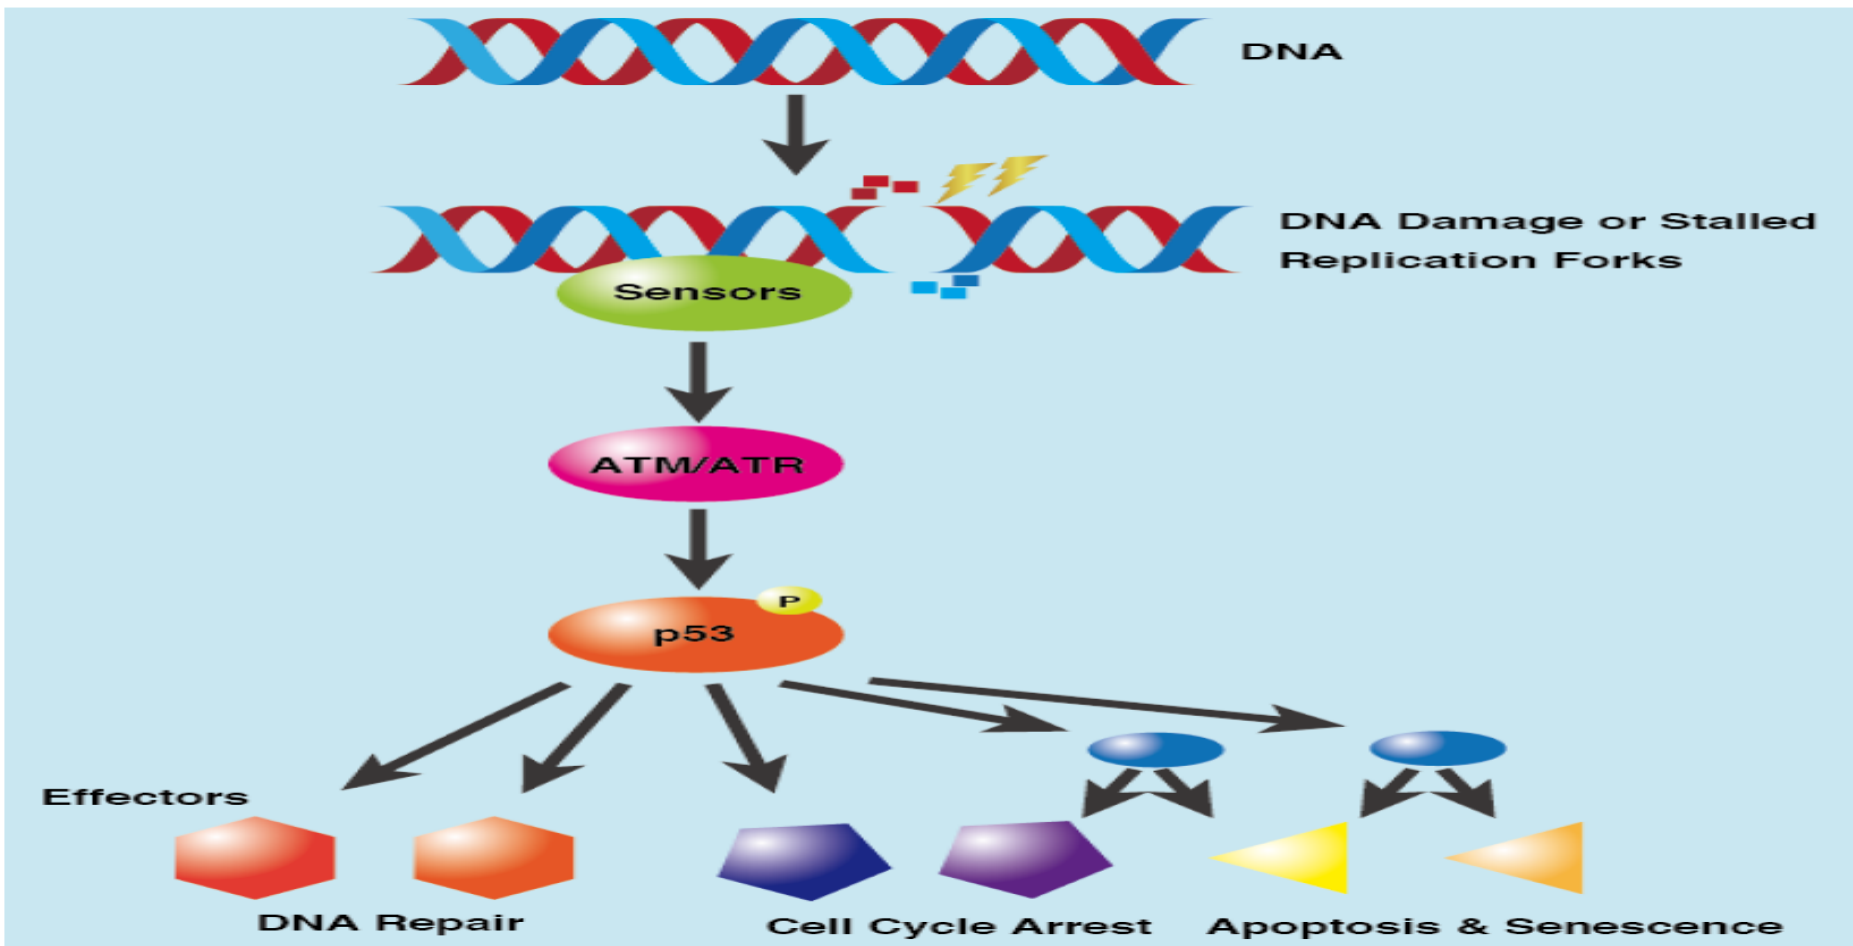

This is a picture of "Schematic representation of p53-mediated DNA Damage Response"

Please give a suitable interpretation of this picture

(Explanation from the original article)

Cellular DNA is constantly under attack by various endogenous metabolites, ionizing radiation, environmental and dietary carcinogens, as well as drugs such as genotoxic anti-cancer agents [39]. Such DNA damage includes base/sugar alterations, DNA-base mismatches, base adducts, sugar base cyclization, DNA protein crosslinking, or intra and inter-strand cross links, all of which result in DNA single- or double-strand breaks (SSBs and DSBs) [40]. While SSBs and other types of DNA damage are relatively less toxic, DSBs are quite dangerous, causing cell death, genomic instability, or carcinogenesis if left unrepaired [41]. DDR involves a broad signalling system that begins seconds after DNA damage and modulates various cellular processes in a concerted, structured manner. It is initiated by DNA damage sensors and signal transducers (ATM and ATR) and effectors (substrates of ATM and ATR) and induces cell cycle checkpoints, activates various DNA repair mechanisms, modulates gene expression, activity and turnover of a wide array of proteins, and thereby affects many aspects of cellular metabolism

The image titled "Schematic representation of p53-mediated DNA Damage Response" illustrates the cellular response to DNA damage or stalled replication forks, with a focus on the role of the p53 protein. Here's a suitable interpretation of the picture:

1. **DNA Damage or Stalled Replication Forks:** The process begins when DNA damage occurs or replication forks stall during DNA replication. This can be caused by various factors such as radiation, chemicals, or errors during replication.
2. **Sensors:** Specialized proteins, such as ATM (Ataxia Telangiectasia Mutated) and ATR (ATM and Rad3-related), act as sensors that detect the DNA damage or stalled replication forks. These proteins are crucial for initiating the DNA damage response.
3. **p53 Activation:** Upon detection of DNA damage, ATM/ATR kinases activate the p53 protein. p53 is a crucial tumor suppressor protein that plays a central role in regulating the cell's response to DNA damage.

4. **Effectors:** Once activated, p53 can trigger several downstream effects:

- **DNA Repair:** p53 can activate genes involved in DNA repair mechanisms, allowing the cell to fix the damaged DNA.
- **Cell Cycle Arrest:** p53 can induce cell cycle arrest, giving the cell time to repair the DNA before proceeding with cell division. This prevents the propagation of damaged DNA.
- **Apoptosis & Senescence:** If the DNA damage is irreparable, p53 can initiate apoptosis (programmed cell death) or senescence (permanent cell cycle arrest), thereby preventing the survival and proliferation of potentially cancerous cells.

In summary, the image depicts the critical role of p53 in coordinating the cellular response to DNA damage, ensuring genomic stability, and preventing cancer development. The p53-mediated pathway is essential for maintaining cellular integrity and preventing the accumulation of genetic mutations.

This schematic representation illustrates the **p53-mediated DNA Damage Response** pathway, which plays a crucial role in maintaining genomic stability and preventing tumorigenesis. Here's a step-by-step interpretation:

### 1.DNA Integrity and Damage Initiation

- The image starts with a **double-helix DNA** structure at the top, representing normal DNA.
- DNA damage or stalled replication forks occur due to factors like radiation, oxidative stress, or replication stress, leading to structural abnormalities.

### 2.Damage Detection by Sensors

- Specific **sensor proteins** detect DNA damage and activate signaling cascades.

### 3.Activation of ATM/ATR Kinases

- **ATM (Ataxia Telangiectasia Mutated) and ATR (Ataxia Telangiectasia and Rad3-related)** proteins are central kinases that get activated upon sensing DNA damage.
- These kinases relay signals downstream by phosphorylating key target proteins, including **p53**.

### 4.p53 Activation as a Central Regulator

- **p53**, a tumor suppressor protein, is phosphorylated (indicated by the 'P' mark in the diagram), which stabilizes and activates it.
- Once activated, p53 functions as a transcription factor, leading to different cellular outcomes.

### 5.Effector Pathways and Cellular Outcomes

Activated p53 triggers three major response mechanisms:

- **DNA Repair:** If the damage is repairable, p53 induces the expression of genes involved in DNA repair.
- **Cell Cycle Arrest:** If the damage is moderate, p53 halts cell cycle progression (at G1/S or G2/M checkpoints) to allow time for DNA repair.
- **Apoptosis & Senescence:** If the damage is irreparable, p53 promotes programmed cell death (apoptosis) or cellular senescence to prevent propagation of the damaged DNA.

### Significance of the Pathway

- This pathway **prevents the accumulation of mutations** and acts as a critical defense against cancer.
- Dysfunction or mutations in **p53** lead to uncontrolled cell growth and tumor formation, as seen in many cancers.
- **Therapeutic targeting** of p53 is a major focus in cancer treatment research.

This schematic provides a **simplified but powerful** visualization of how cells respond to DNA damage through p53 regulation, ultimately deciding between survival or programmed cell death based on the severity of the damage.

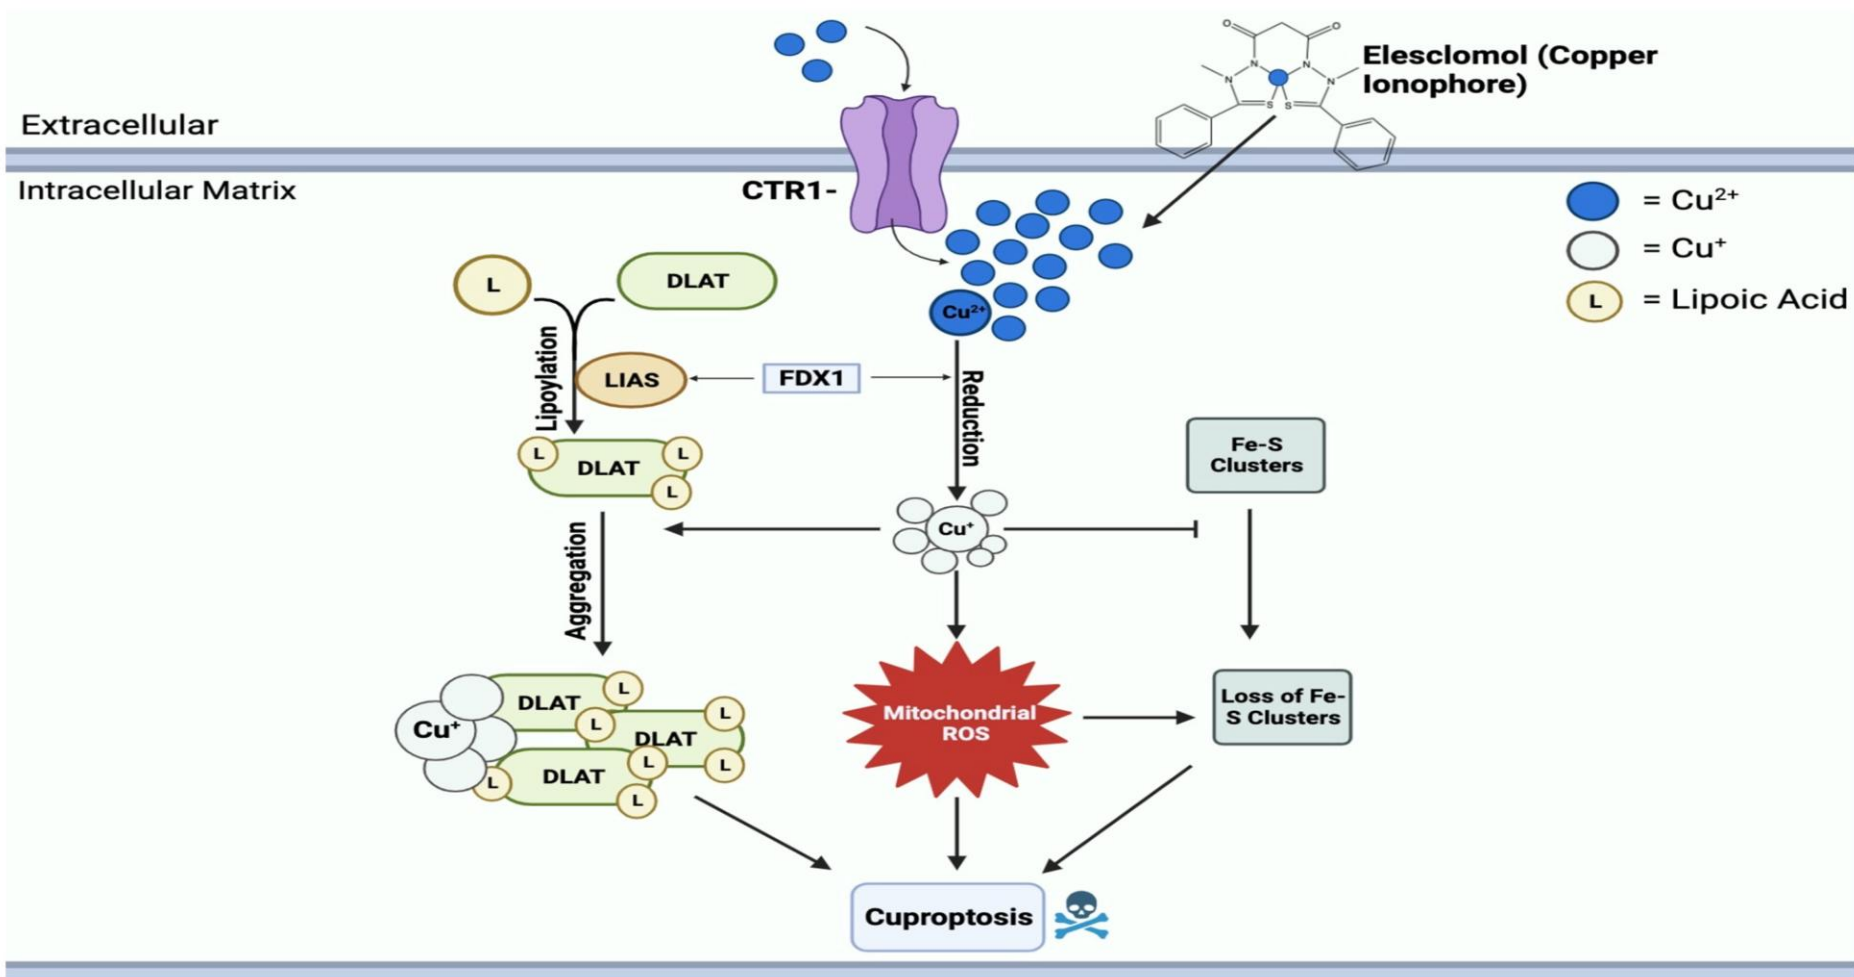

This is a picture of "Mechanisms of copper-induced cell death"

Please give a suitable interpretation of this picture

(Explanation from the original article)

Elesclomol and CTR1 shuttle  $\text{Cu}^{2+}$  into the mitochondrial matrix, creating an accumulation of copper. FDX1 reduces  $\text{Cu}^{2+}$  to  $\text{Cu}^+$ , resulting in ROS formation.  $\text{Cu}^+$  and ROS block the synthesis of Fe-S clusters. FDX1 also binds to LIAS, promoting the lipoylation of DLAT.  $\text{Cu}^+$  further binds to lipoylated DLAT and induces aggregation. Mitochondrial ROS, loss of Fe-S clusters, and DLAT aggregation all contribute to cuproptosis cell death.

The image titled "Mechanisms of copper-induced cell death" appears to illustrate the pathways through which copper can induce cell death, specifically focusing on a process called cuproptosis. Here's a suitable interpretation of the depicted mechanisms:

### 1. Extracellular and Intracellular Matrix:

- The process begins with the extracellular environment and involves the intracellular matrix.
- CTR1 (Copper Transporter 1) is highlighted, indicating its role in copper transport into the cell.
- Key intracellular components such as DLAT (Dihydrolipoamide S-Acetyltransferase), LIAS (Lipoic Acid Synthase), and FDX1 (Ferredoxin 1) are involved in the reduction of copper ions ( $\text{Cu}^{+}$ ).

### 2. Elesclomol (Copper Ionophore) :

- Elesclomol is a copper ionophore that facilitates the transport of copper ions ( $\text{Cu}^{2+}$ ) into the cell, where they are reduced to  $\text{Cu}^{+}$ .
- This process is linked to the production of Lipoic Acid, which is crucial for mitochondrial function.

### 3. Fe-S Clusters:

- The image indicates that the presence of copper ions leads to the aggregation of iron-sulfur (Fe-S) clusters.
- DLAT is repeatedly mentioned, suggesting its significant role in this aggregation process.
- The loss of Fe-S clusters is associated with mitochondrial dysfunction.

### 4. Mitochondrial ROS:

- The disruption of Fe-S clusters leads to the generation of reactive oxygen species (ROS) within the mitochondria.
- This mitochondrial ROS production is a critical factor in the induction of cell death.

### 5. Cuproptosis:

- The culmination of these processes is referred to as cuproptosis, a form of cell death induced by copper.
- This pathway highlights the toxic effects of excessive copper accumulation within cells, leading to mitochondrial damage and ultimately cell death.

In summary, the image outlines a detailed pathway through which copper ions, facilitated by transporters and ionophores, disrupt mitochondrial function by affecting Fe-S clusters and generating ROS, leading to a specific form of cell death known as cuproptosis.

This diagram represents the mechanism of **copper-induced cell death**, also known as **cuproptosis**. It outlines how copper ions ( $\text{Cu}^{2+}$  and  $\text{Cu}^+$ ) interact with mitochondrial metabolic pathways, leading to oxidative stress and cell death.

### Key Elements in the Diagram:

#### 1. Copper ( $\text{Cu}^{2+}$ and $\text{Cu}^+$ ):

- $\text{Cu}^{2+}$  (blue circles) enters the intracellular space via **CTR1**, a copper transporter.
- Once inside the cell,  $\text{Cu}^{2+}$  is reduced to  $\text{Cu}^+$  (white circles).

#### 2. Elesclomol (Copper Ionophore):

- Elesclomol facilitates copper transport into cells, increasing intracellular  $\text{Cu}^{2+}$  levels.

#### 3. Lipoylated Proteins and Cu Accumulation:

- **Lipoylation** (attachment of **lipoic acid**, represented as "L") is an essential modification of key mitochondrial enzymes, such as **DLAT** (Dihydrolipoamide S-acetyltransferase).
- **LIAS (Lipoic Acid Synthetase)** and **FDX1 (Ferredoxin 1)** are involved in the lipoylation process.
- Excess  $\text{Cu}^+$  binds to lipoylated DLAT, causing **protein aggregation**.

#### 4. Mitochondrial Dysfunction and Oxidative Stress:

- The aggregation of Cu-bound DLAT proteins disrupts mitochondrial function.
- This leads to an increase in **mitochondrial reactive oxygen species (ROS)**, causing oxidative stress.

#### 5. Loss of Fe-S Clusters:

- Copper accumulation interferes with **iron-sulfur (Fe-S) cluster proteins**, which are essential for mitochondrial electron transport and metabolic processes.
- The loss of Fe-S clusters further contributes to mitochondrial stress.

#### 6. Cell Death (Cuproptosis):

- The combined effects of **protein aggregation, mitochondrial ROS, and Fe-S cluster loss** ultimately trigger **cuproptosis**, a regulated form of copper-induced cell death.

### Biological Significance:

- Cuproptosis is distinct from other forms of cell death like apoptosis or ferroptosis.
- It is particularly relevant in conditions where copper homeostasis is dysregulated, such as **cancer therapy, neurodegenerative diseases, and Wilson's disease**.
- Elesclomol, a copper ionophore, is being explored for therapeutic applications by exploiting copper toxicity in cancer cells.

### Conclusion:

This diagram illustrates the mechanism by which excess intracellular copper disrupts mitochondrial metabolism, leading to oxidative stress and ultimately **cuproptosis**. Understanding this pathway provides insights into potential therapeutic strategies targeting copper metabolism.



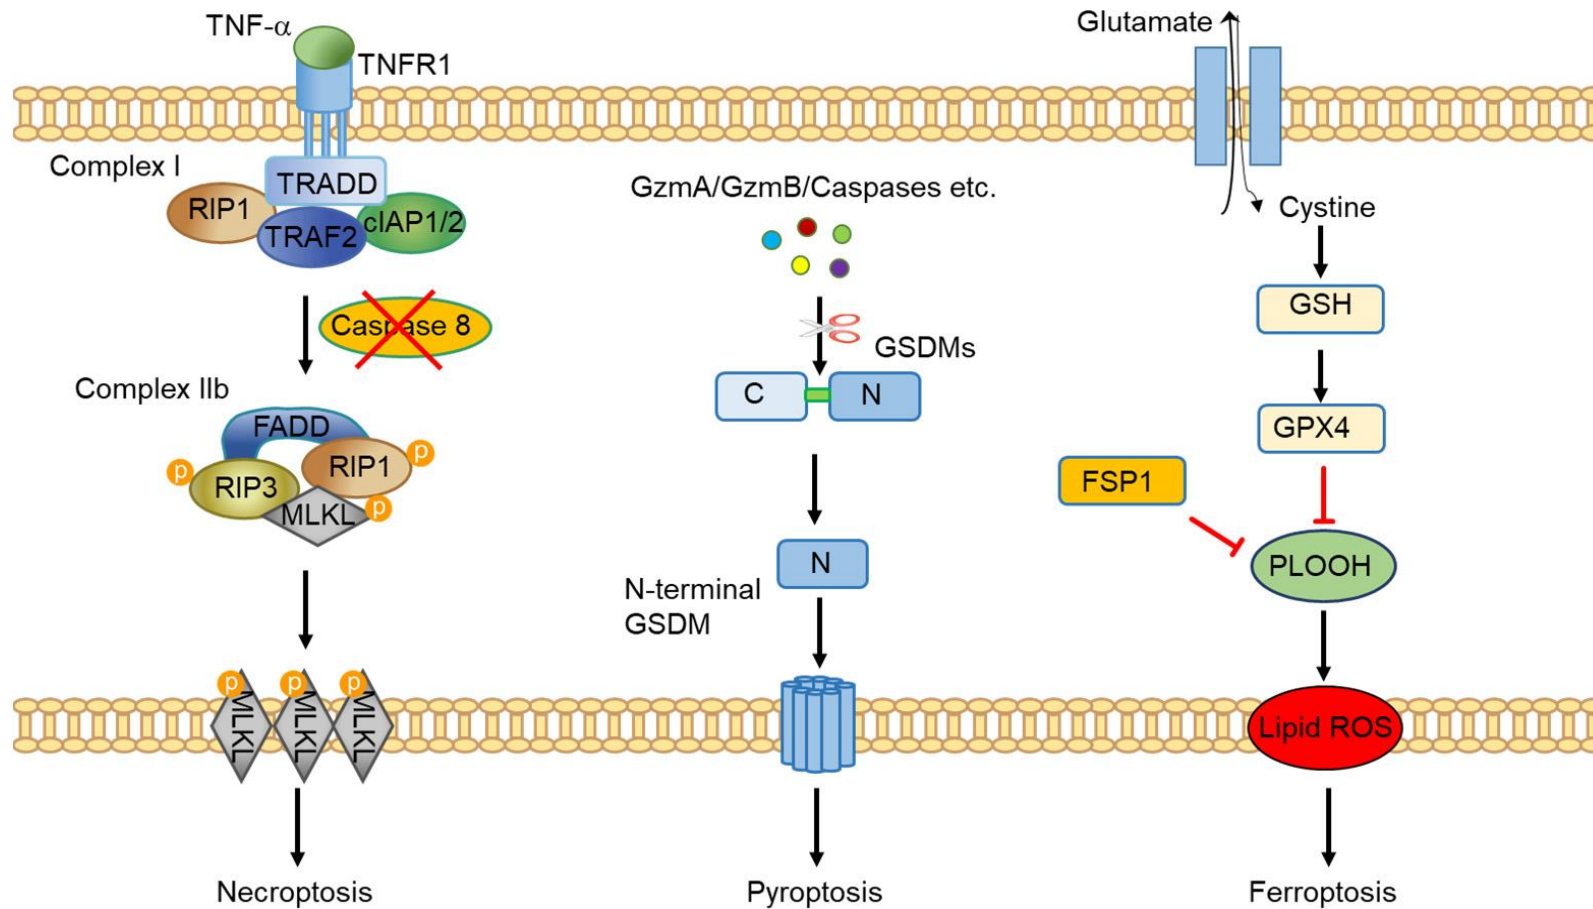

This is a picture of  
“Key non-apoptotic  
regulated cell death  
pathways”

Please give a suitable  
interpretation of this  
picture

(Explanation from the original article)

**Figure 1. Key programmed necrosis pathways.** The classical necroptotic pathway is activated by TNF stimulation. TNF binds to TNFR1 and leads to the formation of complex I. In the absence of caspase 8 activity, RIP1 interacts with RIPK3, FADD and MLKL to form complex IIb, which mediates necroptosis. Pyroptosis has been considered as gasdermin-mediated necrosis. Endogenous caspases and lymphocyte-derived Granzyme A/Granzyme B are able to cleave and activate individual gasdermins (GSDM) which further triggers pyroptosis. Ferroptosis is a failsafe rather than a typical cell death pathway. GPX4 and FSP1 prevent lipid peroxidation which is key to drive ferroptosis.

The image titled "Key non-apoptotic regulated cell death pathways" illustrates several important mechanisms of programmed cell death that do not involve apoptosis. Here's a breakdown of the key components and pathways depicted:

1. **TNF- $\alpha$  (Tumor Necrosis Factor-alpha):** This is a cytokine involved in systemic inflammation and is a key player in initiating various cell death pathways.
2. **Glutamate  $\uparrow$ :** Elevated levels of glutamate can trigger cell death pathways, particularly through excitotoxicity.
3. **Complex I and Complex IIb:** These complexes are part of the signaling pathways initiated by TNF- $\alpha$ .
  - Complex I includes RIP1, TRADD, TRAF2, and cIAP1/2. This complex typically promotes cell survival through NF- $\kappa$ B activation.
  - Complex IIb includes RIP3, FADD, RIP1, and MLK. This complex can lead to necroptosis, a form of programmed necrosis.

4. **GzmA/GzmB/Caspases etc. :** These are proteases involved in various forms of cell death. They can cleave gasdermin proteins (GSDMs), leading to pyroptosis, a form of inflammatory cell death.
5. **GSKI and GPK4:** These are enzymes involved in lipid metabolism and can contribute to ferroptosis, an iron-dependent form of cell death characterized by lipid peroxidation.
6. **FSP1 (Ferroptosis Suppressor Protein 1) :** This protein plays a role in protecting cells from ferroptosis by reducing lipid ROS (reactive oxygen species).

The pathways highlighted in the image are:

- **Necroptosis:** A form of programmed necrosis that is mediated by RIP1 and RIP3.
- **Pyroptosis:** An inflammatory form of cell death mediated by gasdermin proteins and often involving caspases.
- **Ferroptosis:** An iron-dependent form of cell death driven by lipid peroxidation.

These pathways represent critical mechanisms of cell death that are distinct from apoptosis and play significant roles in various physiological and pathological processes, including inflammation, infection, and cancer.

## Interpretation of the Image: Key Non-Apoptotic Regulated Cell Death Pathways

This diagram illustrates three major **non-apoptotic regulated cell death (RCD) pathways**—**necroptosis**, **pyroptosis**, and **ferroptosis**—each involving distinct molecular mechanisms.

### 1. Necroptosis (Left Pathway)

- Initiated by **TNF- $\alpha$  (Tumor Necrosis Factor-alpha)** binding to **TNFR1 (Tumor Necrosis Factor Receptor 1)** on the plasma membrane.
- This activates **Complex I**, which includes **RIP1, TRADD, TRAF2, and cIAP1/2**.
- If **Caspase 8** is inhibited (as indicated by the red cross), **Complex IIb** forms, comprising **RIP1, RIP3, FADD, and MLKL**.
- **MLKL (Mixed Lineage Kinase Domain-like Protein)** undergoes phosphorylation and translocates to the membrane, leading to **necrotic cell death** via membrane permeabilization.

### 2. Pyroptosis (Middle Pathway)

- This inflammatory form of cell death is mediated by **Gasdermins (GSDMs)**.
- Proteases like **Granzyme A (GzmA), Granzyme B (GzmB), and Caspases** cleave **GSDMs**, releasing the **N-terminal fragment**.
- The **N-terminal Gasdermin fragment** forms membrane pores, leading to **cell lysis and inflammation**.

### 3. Ferroptosis (Right Pathway)

- This pathway is characterized by **iron-dependent lipid peroxidation**.
- **Cystine uptake** is crucial for producing **GSH (glutathione)**, which activates **GPX4 (glutathione peroxidase 4)**.
- **GPX4 inhibits lipid peroxidation (PLOOH)**, preventing cell death.
- When **GPX4 is inhibited**, **lipid ROS (reactive oxygen species)** accumulate, leading to **ferroptosis**.
- **FSP1 (Ferroptosis Suppressor Protein 1)** serves as an additional protective mechanism by blocking lipid peroxidation.

### Summary

- **Necroptosis** is regulated by **TNF- $\alpha$ , RIP1, RIP3, and MLKL** and is **Caspase 8-independent**.
- **Pyroptosis** is mediated by **Gasdermins** activated by **Granzymes and Caspases**.
- **Ferroptosis** is triggered by **lipid peroxidation** and regulated by **GPX4 and FSP1**.

This image highlights the complexity of non-apoptotic RCD mechanisms, their molecular regulators, and their impact on cellular fate. These pathways play crucial roles in inflammatory responses, disease pathology, and therapeutic strategies.

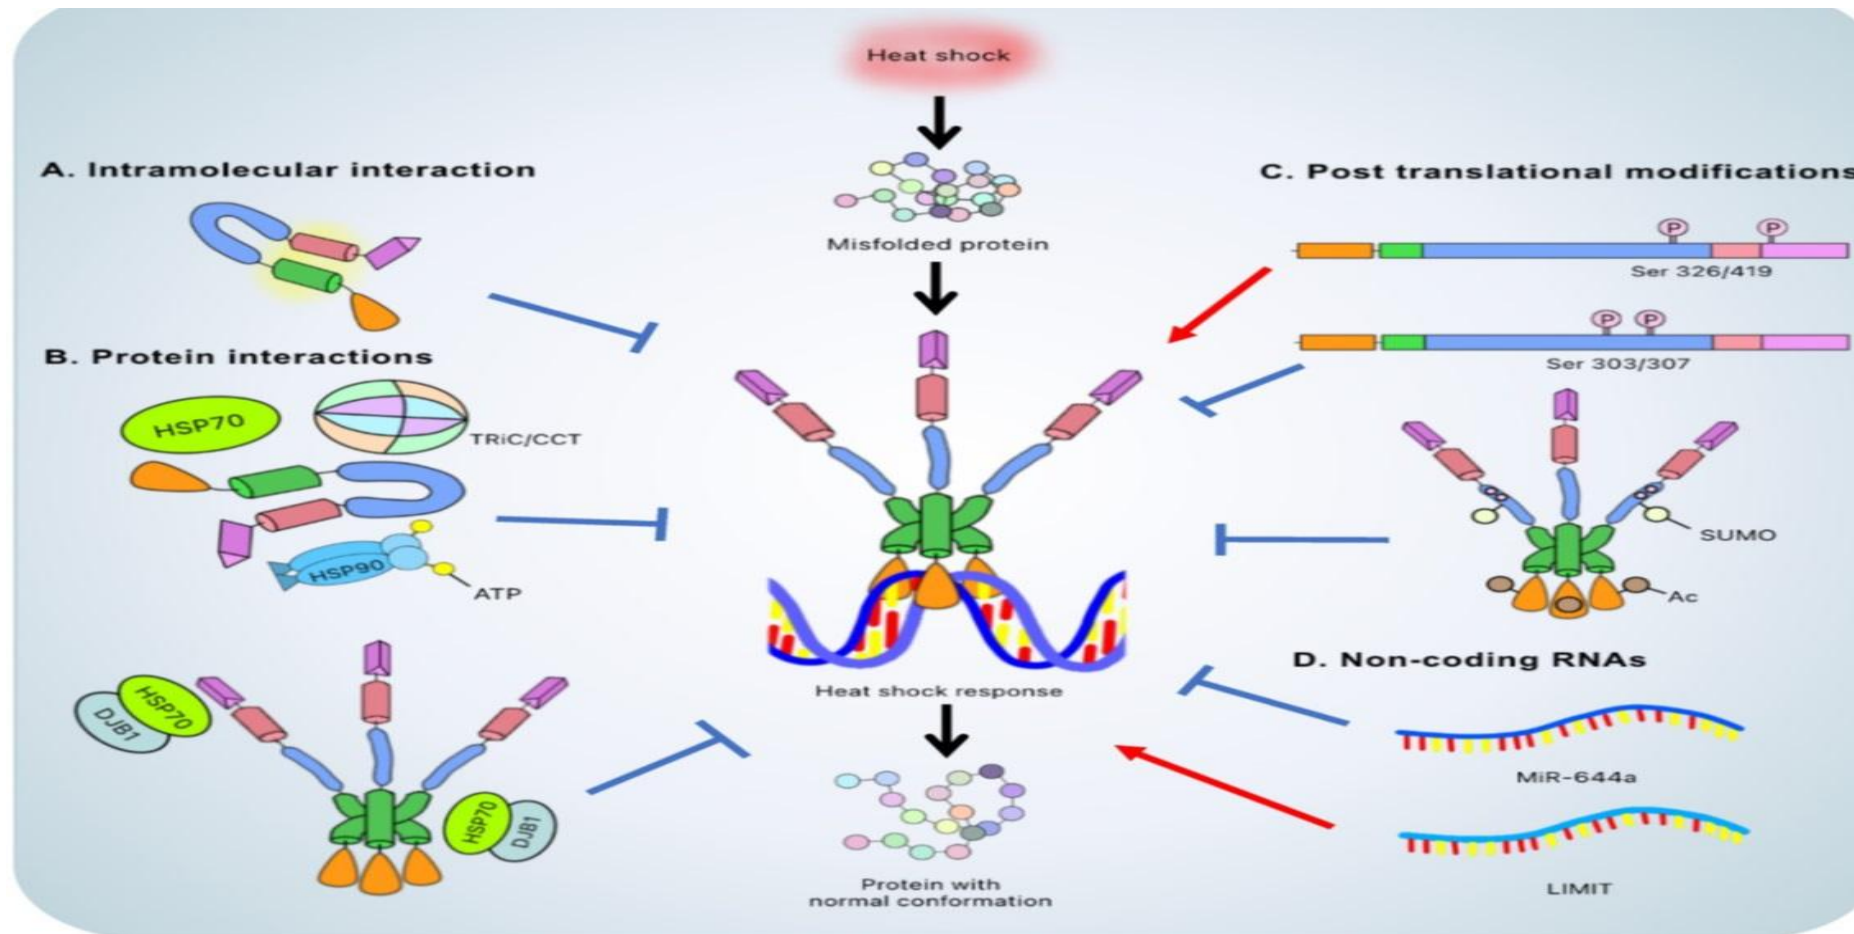

This is a picture of "The heat shock response and the regulator of HSF1"

Please give a suitable interpretation of this picture

(Explanation from the original article)

**The heat shock response and the regulation of HSF1.** The heat shock response is induced by the HSF1 activated trimer binding to the heat shock element that leads to resolution of the heat shock induced stress and accurate protein conformation. The methods to regulate the HSF1 include:

- intramolecular interaction between LZ1-3 and LZ4 to keep the inert monomeric state;
- interaction with other proteins, such as ATP-binding "closed" HSP90, HSP70 and TRiC/CCT to keep the inert monomeric state or interaction between HSP70-DnaJB1 complex and LZ1-3 or TAD to attenuate the heat shock response;
- post translational modification such as phosphorylation of Ser326/419 and Ser303/307 considered to be the activated and inactivated signals, respectively; acetylation of DBD and phosphorylation-dependent SUMOylation of RD to attenuate the heat shock response and
- non-coding RNA to inactivate and activate the heat shock response via miR-644a and LIMIT, respectively.

**Color representation:** DNA-binding domain (orange); leucine zipper 1-3 (green); regulatory domain (blue); leucine zipper 4 (pink); transactivation domain (purple).

The image titled "The heat shock response and the regulation of HSF1" appears to depict the molecular mechanisms involved in the heat shock response (HSR), focusing on the regulation of Heat Shock Factor 1 (HSF1). Here's a possible interpretation of the components mentioned:

1. **Heat Shock:** The initial stimulus that triggers the heat shock response, leading to the activation of HSF1.
2. **Intramolecular Interaction:** This likely refers to the internal interactions within the HSF1 protein that regulate its activity, possibly involving conformational changes.
3. **Post-Translational Modifications:** These are chemical modifications to HSF1 after it is synthesized, such as phosphorylation at Serine 303/307 and Serine 326/419, which can affect its activity and stability.
4. **Misfolded Protein:** The presence of misfolded proteins due to heat shock can activate HSF1, which then promotes the expression of heat shock proteins (HSPs) to assist in protein refolding.
5. **Protein Interactions:** HSF1 interacts with other proteins, including chaperones like TRIC/CCT, which may help in its regulation and function.

6. **SUMO:** Small Ubiquitin-like Modifier (SUMO) proteins can modify HSF1, affecting its stability and activity.
7. **ATP:** Adenosine triphosphate (ATP) is essential for the function of many chaperones and may play a role in the activation or regulation of HSF1.
8. **Non-Coding RNAs:** These RNAs, such as MIR-644a, may regulate HSF1 expression or activity at the post-transcriptional level.
9. **Heat Shock Response:** The overall cellular response to heat shock, involving the activation of HSF1 and subsequent expression of heat shock proteins to protect cells from stress.
10. **Protein with Normal Conformation:** The goal of the heat shock response is to restore proteins to their normal, functional conformations, preventing aggregation and cellular damage.
11. **LIMIT:** This could refer to a regulatory mechanism or a specific factor that limits the activity of HSF1 to prevent excessive stress response.

The image likely illustrates how HSF1 is regulated through various interactions and modifications in response to heat shock, ultimately leading to the restoration of normal protein conformation and cellular homeostasis.

This image provides a schematic representation of the **heat shock response (HSR) and the regulation of heat shock factor 1 (HSF1)** under cellular stress conditions, such as heat shock. Here's a breakdown of the interpretation:

### Central Theme: The Heat Shock Response

- Heat shock or other stressors lead to protein misfolding, triggering the heat shock response.
- The misfolded proteins activate HSF1, which then undergoes regulatory modifications and interactions to restore proteostasis (protein homeostasis).

### Regulation of HSF1: Key Mechanisms

#### 1. Intramolecular Interaction (A)

- Structural rearrangements within HSF1 influence its activity.
- Different domains within HSF1 interact to modulate its function.

#### 2. Protein Interactions (B)

- **Chaperone Proteins (HSP70, HSP90, TRiC/CCT)**
  - These heat shock proteins (HSPs) bind to misfolded proteins and facilitate proper folding.
  - ATP-dependent chaperone activity is involved in stabilizing proteins.
  - Direct interactions between HSPs and HSF1 regulate its activation and function.
- **Other Co-factors (DJB1, etc.)**
  - Additional cofactors help stabilize HSF1 or modulate its activity.

### 3. Post-Translational Modifications (C)

- HSF1 undergoes multiple post-translational modifications (PTMs), including:
  - **Phosphorylation** at specific serine residues (Ser 326/419 and Ser 303/307), which can influence HSF1 activation or repression.
  - **SUMOylation (SUMO modification) and Acetylation (Ac modification)**, which fine-tune HSF1's stability and transcriptional activity.

### 4. Non-coding RNAs (D)

- Specific non-coding RNAs, such as **MiR-644a and LIMIT**, regulate HSF1 activity at the RNA level, affecting its expression and response to heat shock.

### Final Outcome

- Activated HSF1 induces the expression of heat shock proteins (HSPs) and other protective mechanisms.
- This leads to the refolding or degradation of misfolded proteins, restoring normal protein conformation and cellular homeostasis.

### Significance

- The heat shock response is crucial for protecting cells from stress-induced damage.
- Dysregulation of HSF1 is linked to neurodegenerative diseases, cancer, and aging-related disorders.
- Understanding these regulatory mechanisms can help in developing therapeutic strategies for stress-related diseases.

This image effectively illustrates how multiple regulatory pathways converge on HSF1 to ensure a coordinated response to proteotoxic stress.



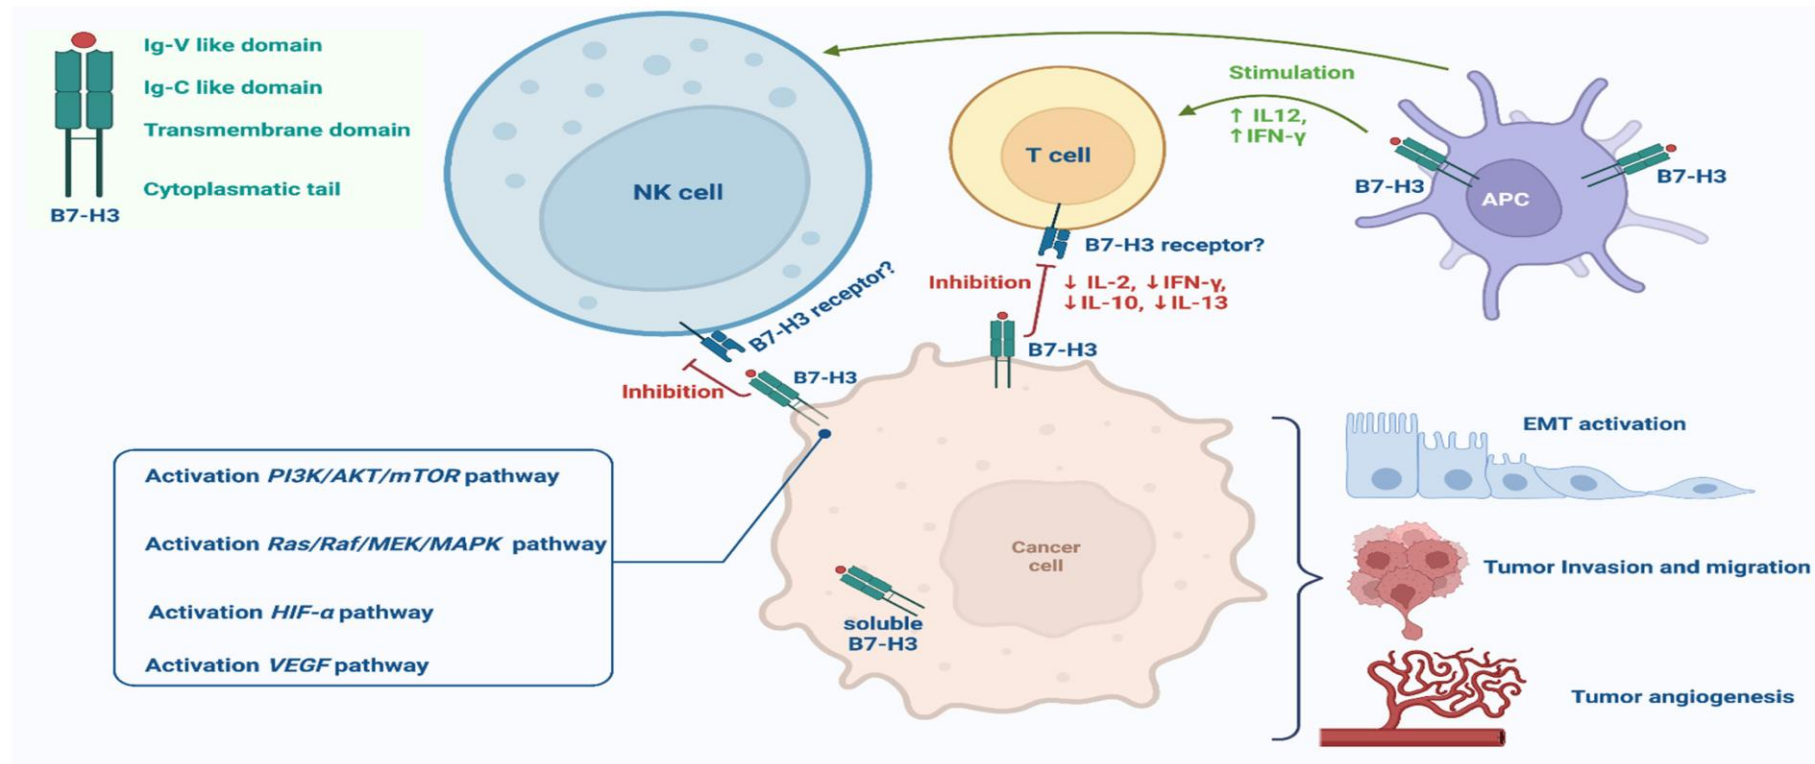

This is a picture of "B7-H3 non-immune-mediated and immune-mediated signaling pathways" Please give a suitable interpretation of this picture

(Explanation from the original article)

B7-H3 non-immune-mediated (box in the lower left corner) and immune-mediated (cartoon) signaling pathways. *PI3K/AKT/mTOR* and *Ras/Raf/MEK/MAPK* signaling pathways are involved in promoting the migration, invasion, and epithelial–mesenchymal transition (ETM) of cancer cells. *HIF-α* pathway is involved in glucose metabolic reprogramming and enhancing neoplastic tumor growth. *VEGF* signaling pathway is involved in promoting neo-angiogenesis and metastasis. B7-H3 acts as immune co-stimulatory molecule, increasing IFN-γ and IL-12 levels and promoting CD4<sup>+</sup> and CD8<sup>+</sup> T cells' proliferation and enhancing cytotoxic T cell activity. Moreover, B7-H3 plays an immune co-inhibitory role, reducing cytokines (IL-2, IL-10, IL-13, and IFN-γ) and inhibiting T cell proliferation and NK cell activity.

The image titled "B7-H3 non-immune-mediated and immune-mediated signaling pathways" illustrates the dual roles of B7-H3 in both immune-mediated and non-immune-mediated processes, particularly in the context of cancer.

### 1. Immune-Mediated Signaling:

- **B7-H3 and Immune Cells:** B7-H3 interacts with immune cells such as NK cells and T cells, leading to inhibitory effects. This interaction results in the downregulation of various cytokines, including IL-2, IFN- $\gamma$ , IL-10, and IL-13. These cytokines are crucial for immune activation and response, suggesting that B7-H3 may play a role in immune evasion by tumors.
- **B7-H3 Receptor:** The image hints at the presence of a B7-H3 receptor on immune cells, which mediates these inhibitory effects.

### 2. Non-Immune-Mediated Signaling:

- **Pathway Activation:** B7-H3 activates several key signaling pathways that are involved in cancer progression:
- **PI3K/AKT/mTOR Pathway:** This pathway is crucial for cell survival, growth, and proliferation.
- **Ras/Raf/MEK/MAPK Pathway:** This pathway is involved in cell division and differentiation.
- **HIF- $\alpha$  Pathway:** This pathway is activated under hypoxic conditions and contributes to tumor adaptation and survival.
- **VEGF Pathway:** This pathway promotes angiogenesis, the formation of new blood vessels that supply nutrients to the tumor.
- **Tumor Progression:** The activation of these pathways leads to several oncogenic processes:
- **Epithelial-Mesenchymal Transition (EMT):** This process is associated with increased tumor invasion and migration.
- **Tumor Angiogenesis:** The formation of new blood vessels supports tumor growth and metastasis.

In summary, B7-H3 appears to have a dual role in cancer biology. It not only suppresses immune responses, aiding in immune evasion, but also promotes tumor progression through the activation of multiple oncogenic signaling pathways. This makes B7-H3 a potential target for cancer therapy, as inhibiting its function could simultaneously enhance immune responses and hinder tumor growth.



This image provides an overview of the immune-mediated and non-immune-mediated signaling pathways associated with **B7-H3**, a member of the **B7 family of immune checkpoint molecules**. B7-H3 plays a dual role in cancer progression by influencing both immune system regulation and tumor-intrinsic signaling.

### Key Elements in the Image

#### 1. B7-H3 Structure (Top Left Corner):

- Consists of **Ig-V like and Ig-C like domains**, a **transmembrane domain**, and a **cytoplasmic tail**.
- Found on different immune and tumor cells.

#### 2. Immune-Mediated Pathways (Top Right & Center):

- ❑ **B7-H3 on Antigen-Presenting Cells (APCs):**
  - Promotes **stimulation** of T cells by increasing **IL-12** and **IFN- $\gamma$** , which are crucial cytokines for immune response.
- ❑ **B7-H3 on Cancer Cells:**
  - Leads to **inhibition** of immune responses by suppressing T cell function (**decreased IL-2, IFN- $\gamma$ , IL-10, and IL-13**).
  - Potentially inhibits **NK cell cytotoxicity**, although the presence of a **B7-H3 receptor on NK cells remains uncertain**.

#### 3. Non-Immune-Mediated Tumor Signaling Pathways (Bottom Left & Right):

- ❑ **Cancer Cell-Associated B7-H3:**
  - Activates key oncogenic signaling pathways:
    - **PI3K/AKT/mTOR pathway:** Promotes cancer cell survival and growth.
    - **Ras/Raf/MEK/MAPK pathway:** Enhances proliferation.
    - **HIF- $\alpha$  pathway:** Induces hypoxia responses, aiding tumor adaptation.
    - **VEGF pathway:** Stimulates angiogenesis for tumor vascularization.
- ❑ **Soluble B7-H3:**
  - Can contribute to tumor progression via extracellular signaling.

#### 4. Tumor Progression Outcomes (Bottom Right):

- ❑ **Epithelial-Mesenchymal Transition (EMT) Activation:** Facilitates metastasis by making cancer cells more migratory.
- ❑ **Tumor Invasion and Migration:** Supports the spread of cancer cells.
- ❑ **Tumor Angiogenesis:** Helps in the formation of new blood vessels, supplying nutrients to tumors.

#### Overall Interpretation

- ❑ **B7-H3 has both immune-regulatory and oncogenic roles:**
  - It can suppress **T cell and NK cell-mediated anti-tumor immunity**.
  - It contributes to **tumor growth, metastasis, and angiogenesis** via multiple pathways.
- ❑ **Targeting B7-H3** could be a potential therapeutic approach for **cancer immunotherapy and anti-tumor treatment**.

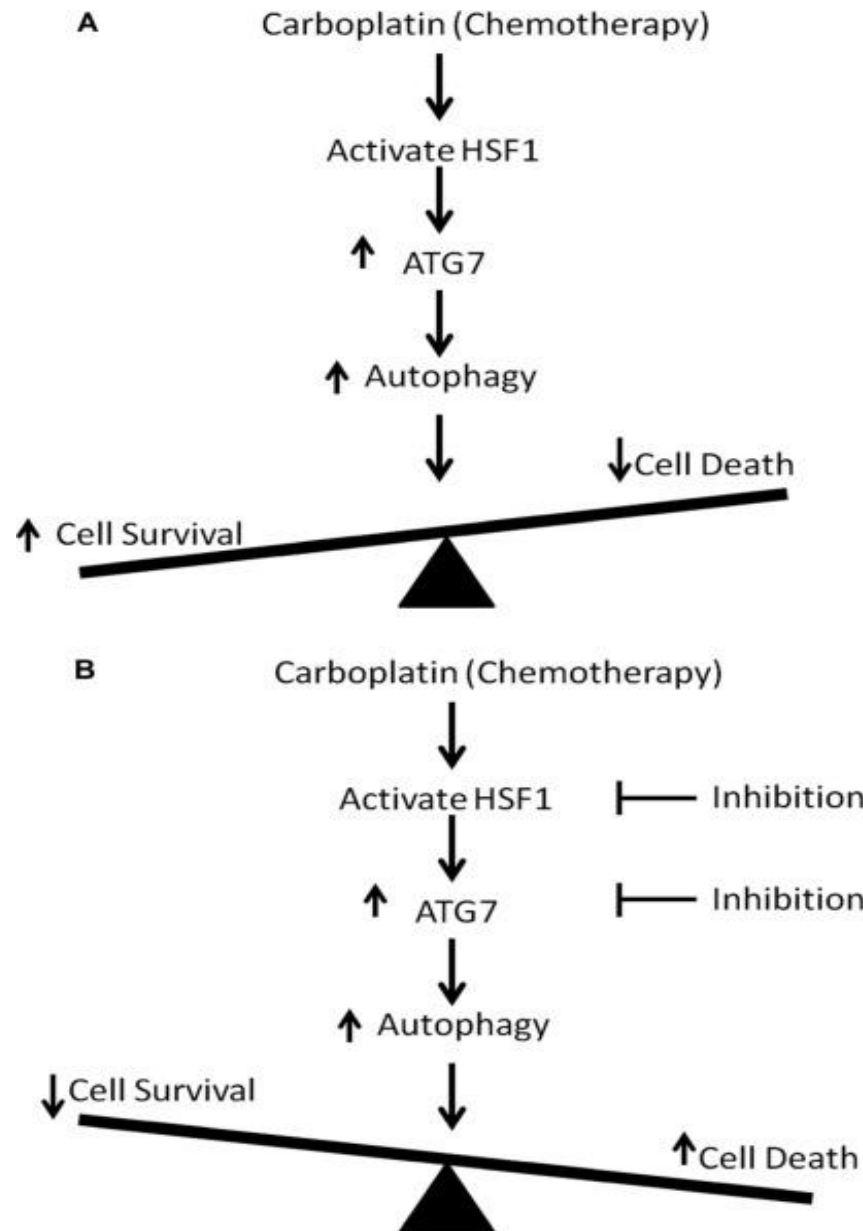

This is a picture of "Carboplatin, HSF1 and Autophagy"  
Please give a suitable interpretation of this picture

(Explanation from the original article)

A, carboplatin treatment activates HSF1 (increasing trimer formation, nuclear translocation, and phosphorylation) which allows HSF1 to bind to and up-regulate transcription of ATG7 leading to an increase in autophagy. An increase in autophagy leads to an increase in cell survival and a reduction in amount of cell death.

B, inhibition of HSF1 activity or reduction in ATG7 levels may lead to a reduction in autophagy and improve the cellular response to carboplatin.

The image appears to depict the relationship between Carboplatin (a chemotherapy drug), HSF1 (Heat Shock Factor 1), and autophagy in determining cell survival or cell death.

Panel A:

- ❑ Carboplatin treatment leads to the activation of HSF1.
- ❑ Activated HSF1 then promotes the expression of ATG7, a key protein involved in the autophagy process.
- ❑ Autophagy is a cellular process that can either promote cell survival by removing damaged components or lead to cell death under certain conditions.

In this scenario, the activation of autophagy appears to result in cell death.

Panel B:

- ❑ Similar to Panel A, Carboplatin treatment activates HSF1 and subsequently ATG7, leading to autophagy.
- ❑ However, in this case, the inhibition of HSF1 or ATG7 is shown to block the autophagy process.
- ❑ The inhibition of autophagy shifts the balance towards cell survival, suggesting that autophagy in this context is contributing to cell death.

Interpretation:

The image illustrates that Carboplatin-induced activation of HSF1 and subsequent autophagy can lead to cell death. However, if HSF1 or ATG7 is inhibited, autophagy is blocked, resulting in increased cell survival. This suggests that the autophagy pathway plays a crucial role in determining the fate of cells treated with Carboplatin, and targeting this pathway could potentially influence the effectiveness of the chemotherapy.

This image illustrates the role of Heat Shock Factor 1 (HSF1) and ATG7-mediated autophagy in determining cell survival or death in response to carboplatin chemotherapy.

**Interpretation:**

**1.Panel A (Top Figure) – Baseline Response to Carboplatin:**

- Carboplatin activates **HSF1**, which in turn upregulates **ATG7**.
- ATG7 promotes **autophagy**, a process that can have dual roles in cell survival and death.
- The balance in this case tilts towards **cell survival**, suggesting that autophagy provides a protective effect in the presence of carboplatin.

**2.Panel B (Bottom Figure) – Inhibition of HSF1 or ATG7:**

- When **HSF1 or ATG7 is inhibited**, the downstream activation of autophagy is impaired.
- Without autophagy, **cell survival decreases**, and the balance shifts towards **increased cell death**.
- This suggests that **HSF1-mediated autophagy plays a pro-survival role in response to carboplatin treatment**.

**Conclusion:**

- ❑ The figure indicates that autophagy, mediated by **HSF1 and ATG7**, supports **cell survival** in response to chemotherapy.
- ❑ Inhibiting either **HSF1 or ATG7** disrupts autophagy and enhances **cell death**, implying that targeting these pathways could potentially increase the effectiveness of carboplatin-induced cytotoxicity in cancer therapy.

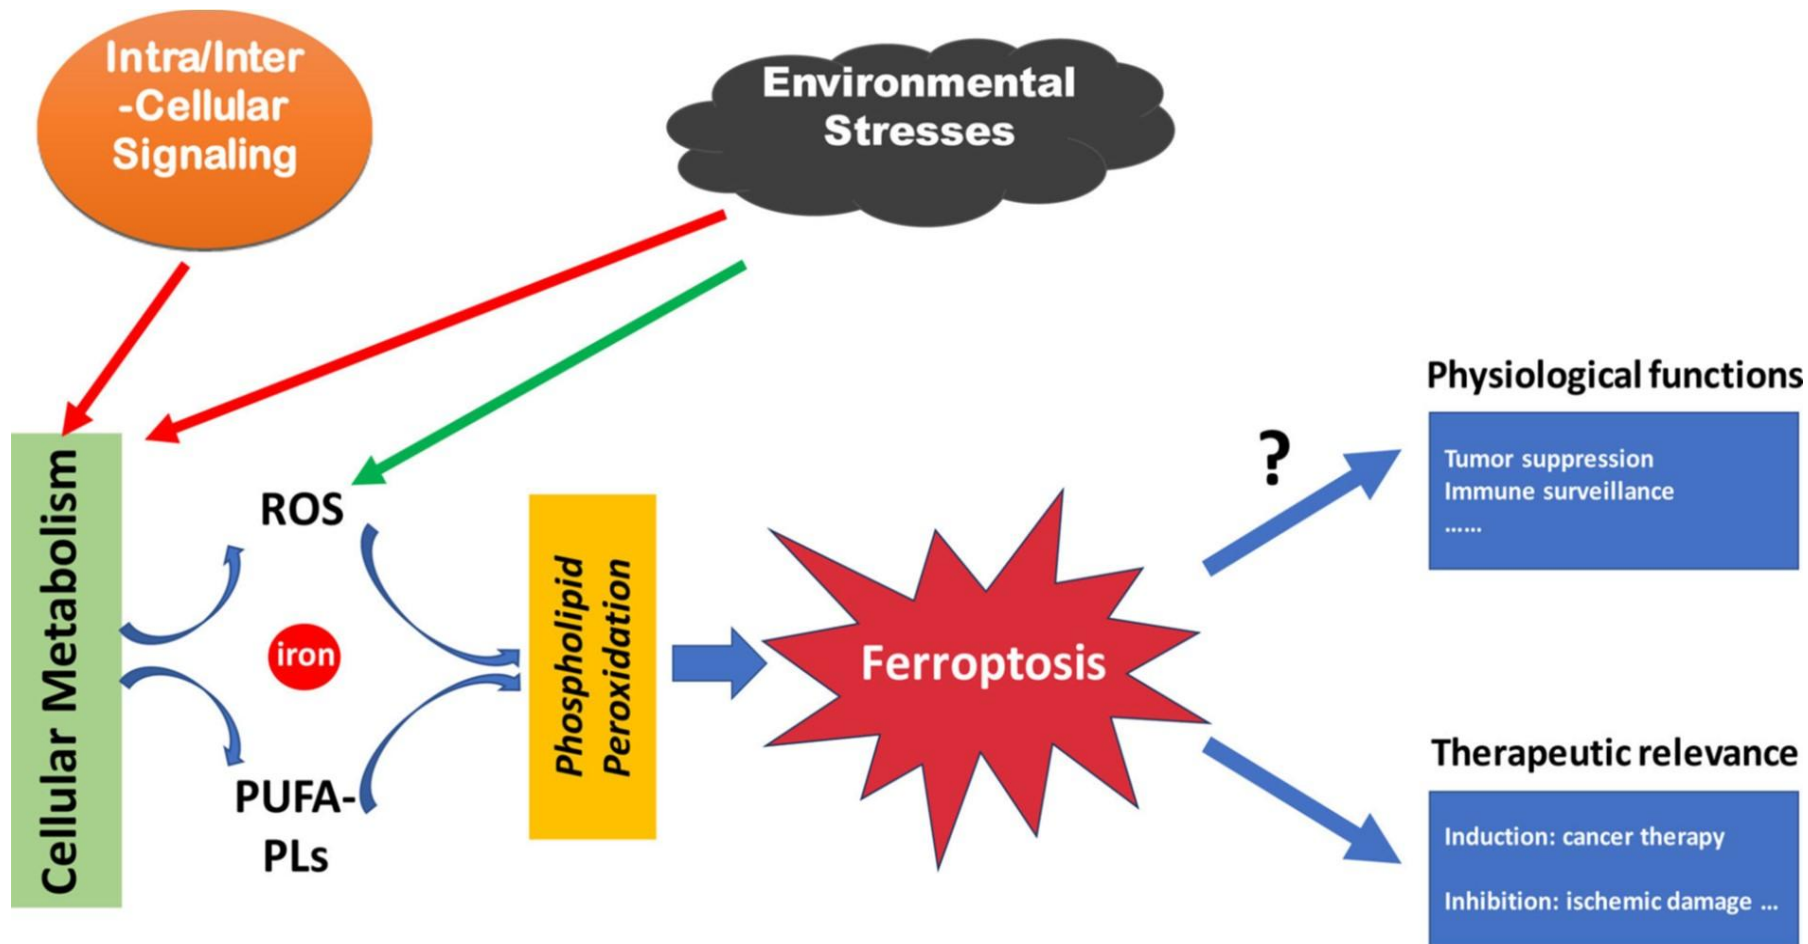

This is a picture of "An Overview of ferroptosis"  
Please give a suitable interpretation of this picture

(Explanation from the original article)

ferroptosis is executed by phospholipid peroxidation, a process relying on metabolic products reactive oxygen species (ROS), phospholipid containing polyunsaturated fatty acid chain(s) (PUFA-PL), and transition metal iron, and that intra- and intercellular signaling events and environmental stresses can impact ferroptosis by regulating cellular metabolism and ROS level. The figure also shows the role of ferroptosis in disease and its potential physiological functions.

The image titled "An Overview of Ferroptosis" provides a conceptual framework for understanding the process of ferroptosis, a form of regulated cell death characterized by iron-dependent lipid peroxidation. Here's a suitable interpretation of the picture based on the provided content:

1. **Intra/Inter-Cellular Signaling:** The image likely illustrates the signaling pathways within and between cells that contribute to ferroptosis. This includes how environmental stresses and cellular metabolism play a role in initiating the process.
2. **Environmental Stresses:** The diagram probably highlights various environmental factors that can trigger ferroptosis, such as oxidative stress and the presence of reactive oxygen species (ROS).
3. **Cellular Metabolism:** The image may depict how metabolic processes, particularly those involving iron and polyunsaturated fatty acids (PUFAs) in phospholipids (PUFA-PLS), are crucial for ferroptosis.
4. **ROS, Iron, and PUFA-PLS:** These components are central to ferroptosis. The image likely shows how iron catalyzes the formation of ROS, leading to the peroxidation of phospholipids containing PUFAs.
5. **Phospholipid Peroxidation:** This is a key event in ferroptosis. The image probably illustrates how the peroxidation of phospholipids disrupts cell membrane integrity, leading to cell death.
6. **Ferroptosis:** The central focus of the image, showing the culmination of the above processes resulting in ferroptotic cell death.
7. **Physiological Functions:** The image may also touch on the physiological roles of ferroptosis, such as its involvement in tumor suppression and immune surveillance.
8. **Therapeutic Relevance:** Finally, the image likely highlights the therapeutic potential of inducing ferroptosis in cancer therapy and inhibiting it to prevent ischemic damage.

Overall, the image serves as a comprehensive visual summary of the mechanisms, triggers, and implications of ferroptosis in cellular biology and medicine.

## Interpretation of the Diagram: "An Overview of Ferroptosis"

This diagram presents a conceptual overview of ferroptosis, a form of regulated cell death driven by iron-dependent lipid peroxidation. It highlights key contributing factors, pathways, and physiological/therapeutic implications.

### Key Components & Interactions

#### 1. Cellular Metabolism & ROS Production

- Cellular metabolism plays a central role in generating reactive oxygen species (ROS).
- ROS are further influenced by intracellular and intercellular signaling.
- Environmental stresses can also enhance ROS production.

#### 2. Iron & Lipid Peroxidation

- Iron contributes to the production of ROS.
- ROS act on polyunsaturated fatty acid-containing phospholipids (PUFA-PLs), leading to **phospholipid peroxidation**, a key driver of ferroptosis.

#### 3. Ferroptosis Induction

- The culmination of ROS generation, iron involvement, and lipid peroxidation results in ferroptotic cell death.

## Physiological & Therapeutic Implications

### 1. Physiological Functions (Possible Roles)

Ferroptosis may contribute to:

- Tumor suppression (eliminating cancerous cells).
- Immune surveillance, potentially by removing harmful or dysfunctional cells.
- Other unidentified roles (represented by the question mark).

### 2. Therapeutic Relevance

- Induction of ferroptosis: Explored as a strategy in cancer therapy, where ferroptotic cell death could selectively eliminate cancer cells.
- Inhibition of ferroptosis: Important in conditions like ischemic damage, where preventing excessive cell death could be protective.

## Conclusion

This diagram effectively illustrates the molecular mechanisms of ferroptosis and its broader implications. Ferroptosis is influenced by cellular metabolism, ROS, and lipid peroxidation, with iron playing a critical role. Its physiological relevance remains under investigation, but it has promising therapeutic potential in cancer and ischemic diseases.

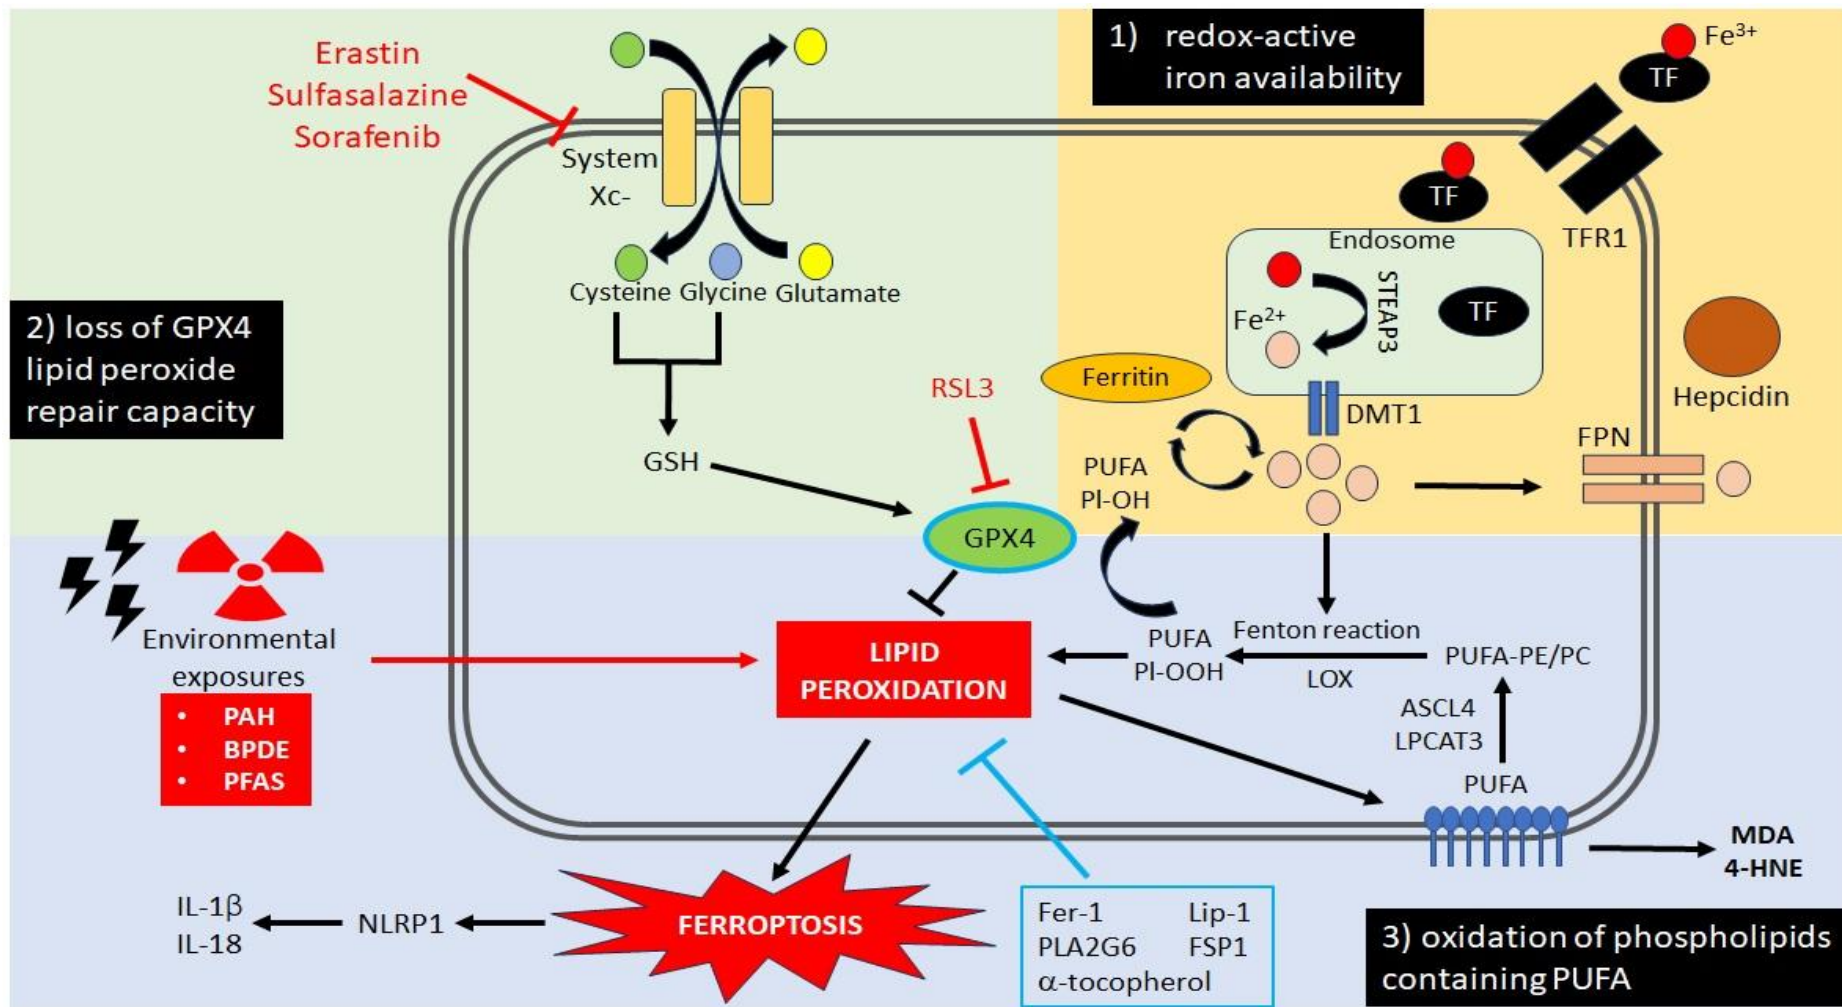

This is a picture of  
"Three hallmarks of  
ferroptosis"

Please give a suitable  
interpretation of this  
picture

(Explanation from the original article)

Three hallmarks of ferroptosis. Ferroptosis occurs via three separate routes that can be identified. The increase of intracellular  $Fe^{2+}$  indicates redox-active iron availability. This occurrence initiates the Fenton reaction, which results in lipid peroxidation. The second mechanism involves the loss of GPX4 capacity, a powerful antioxidant capable of inhibiting lipid peroxidation and protecting cells from harmful PUFA PI-OOH. GPX4 is the primary regulator of ferroptosis and is essential in this situation. The oxidation of PUFA, which makes up the cell membrane, is the final feature of ferroptosis. Excessive lipid peroxidation converts PUFA into PUFA PI-OOH, and disintegrates the cell membrane, allowing the cells to undergo ferroptosis



The image titled "Three Hallmarks of Ferroptosis" outlines key mechanisms and components involved in the process of ferroptosis, a form of regulated cell death characterized by iron-dependent lipid peroxidation. Here's a suitable interpretation of the picture:

1. Redox-Active Iron Availability:

Ferroptosis is driven by the presence of redox-active iron, which catalyzes the formation of reactive oxygen species (ROS). The System Xc- (a cystine/glutamate antiporter) plays a crucial role in maintaining cellular redox balance by importing cystine, which is converted to cysteine for glutathione synthesis. Inhibitors like Erastin and RSL3 disrupt this system, leading to reduced glutathione levels and impaired antioxidant defense.

2. Loss of GPX4 Lipid Peroxide Repair Capacity:

Glutathione peroxidase 4 (GPX4) is a key enzyme that repairs lipid peroxides, preventing their accumulation. Environmental exposures to substances like polycyclic aromatic hydrocarbons (PAH), benzo[a]pyrene diol epoxide (BPDE), and per- and polyfluoroalkyl substances (PFAS) can compromise GPX4 function. Loss of GPX4 activity leads to the accumulation of lipid peroxides, driving ferroptosis.

3. Oxidation of Phospholipids Containing PUFA:

Polyunsaturated fatty acids (PUFAs) in phospholipids are particularly susceptible to peroxidation. This process is exacerbated by the presence of redox-active iron and the loss of GPX4 activity. Compounds like LIP-1, PLAC8, and  $\alpha$ -tocopherol (vitamin E) can inhibit lipid peroxidation, thereby protecting against ferroptosis.

4. MDA and 4-HNE:

Malondialdehyde (MDA) and 4-hydroxynonenal (4-HNE) are byproducts of lipid peroxidation and serve as markers of oxidative stress and ferroptosis.

In summary, the image highlights the interplay between redox-active iron, lipid peroxidation, and the loss of antioxidant defense mechanisms (particularly GPX4) as central to the induction of ferroptosis. Environmental factors and specific inhibitors can modulate these pathways, influencing cell survival or death.

This image illustrates the **three hallmarks of ferroptosis**, a form of regulated cell death characterized by iron-dependent lipid peroxidation. Below is a breakdown of the key elements and their interpretation:

### 1) Redox-active iron availability (Top Right, Yellow Box)

- ❑ Ferroptosis is **iron-dependent**, and iron metabolism plays a central role in this process.
- ❑ **Iron Transport:**
  - **Transferrin (TF)** transports iron (**Fe<sup>3+</sup>**) into the cell via **Transferrin Receptor 1 (TFR1)**.
  - **Endosomal processing:** Inside the endosome, **STEAP3** reduces Fe<sup>3+</sup> to Fe<sup>2+</sup>.
  - **DMT1 (Divalent Metal Transporter 1)** then transports Fe<sup>2+</sup> into the cytosol.
- ❑ **Ferritin** stores excess Fe<sup>2+</sup>, but **ferritinophagy** can release it, increasing free iron.
- ❑ **Iron-catalyzed reactions** (Fenton reaction) generate **reactive oxygen species (ROS)** that promote lipid peroxidation, leading to ferroptosis.

### 2) Loss of GPX4 lipid peroxide repair capacity (Middle Left, Blue Box)

- ❑ **Glutathione Peroxidase 4 (GPX4)** is a key enzyme that detoxifies lipid peroxides.
- ❑ **Glutathione (GSH)** is needed for GPX4 function, and its synthesis depends on **System Xc<sup>-</sup>**, which imports **cysteine** for GSH production.
- ❑ **Inhibitors of System Xc<sup>-</sup>** (Erastin, Sulfasalazine, Sorafenib) reduce cysteine uptake, depleting GSH and impairing GPX4 function.
- ❑ **RSL3** directly inhibits GPX4, leading to lipid peroxide accumulation and ferroptosis.
- ❑ **Environmental exposures (PAH, BPDE, PFAS)** also contribute to oxidative stress and lipid peroxidation.

### 3) Oxidation of phospholipids containing polyunsaturated fatty acids (PUFA) (Bottom Right, Black Box)

- ❑ PUFAs are **highly susceptible** to oxidative damage, leading to **lipid peroxidation**.
- ❑ **Lipid Peroxidation Pathway:**
  - PUFAs are incorporated into membranes via **LPCAT3** and **ASCL4**.
  - **Lipoxygenases (LOX)** catalyze the oxidation of **PUFA-containing phospholipids (PUFA-PE/PC)**.
  - The Fenton reaction further amplifies peroxidation.
  - This results in toxic lipid peroxides (**MDA, 4-HNE**) that drive ferroptosis.

### Ferroptosis Execution

- ❑ Uncontrolled lipid peroxidation leads to **membrane damage and rupture**, triggering **ferroptotic cell death**.
- ❑ **Pro-inflammatory response:** Activation of the **NLRP1 inflammasome** leads to the release of **IL-1β** and **IL-18**, contributing to inflammatory signaling.

### Ferroptosis Inhibitors (Cytoprotective Factors)

- ❑ **Antioxidants and inhibitors** can prevent ferroptosis:
  - **Fer-1, Lip-1, FSP1** (Ferrostatin-1, Liproxstatin-1) act as ferroptosis inhibitors.
  - **PLA2G6** and **α-tocopherol (Vitamin E)** provide protective effects.

### Conclusion

This image presents **three key hallmarks of ferroptosis**:

**1. Iron availability and metabolism** drive oxidative stress.

**2. GPX4 inactivation** removes protective mechanisms against lipid peroxidation.

**3. Oxidation of PUFA-containing phospholipids** disrupts membrane integrity, leading to cell death.

These pathways collectively highlight how ferroptosis is regulated and provide insight into potential therapeutic targets for conditions where ferroptosis plays a role (e.g., neurodegeneration, cancer, ischemia-reperfusion injury).

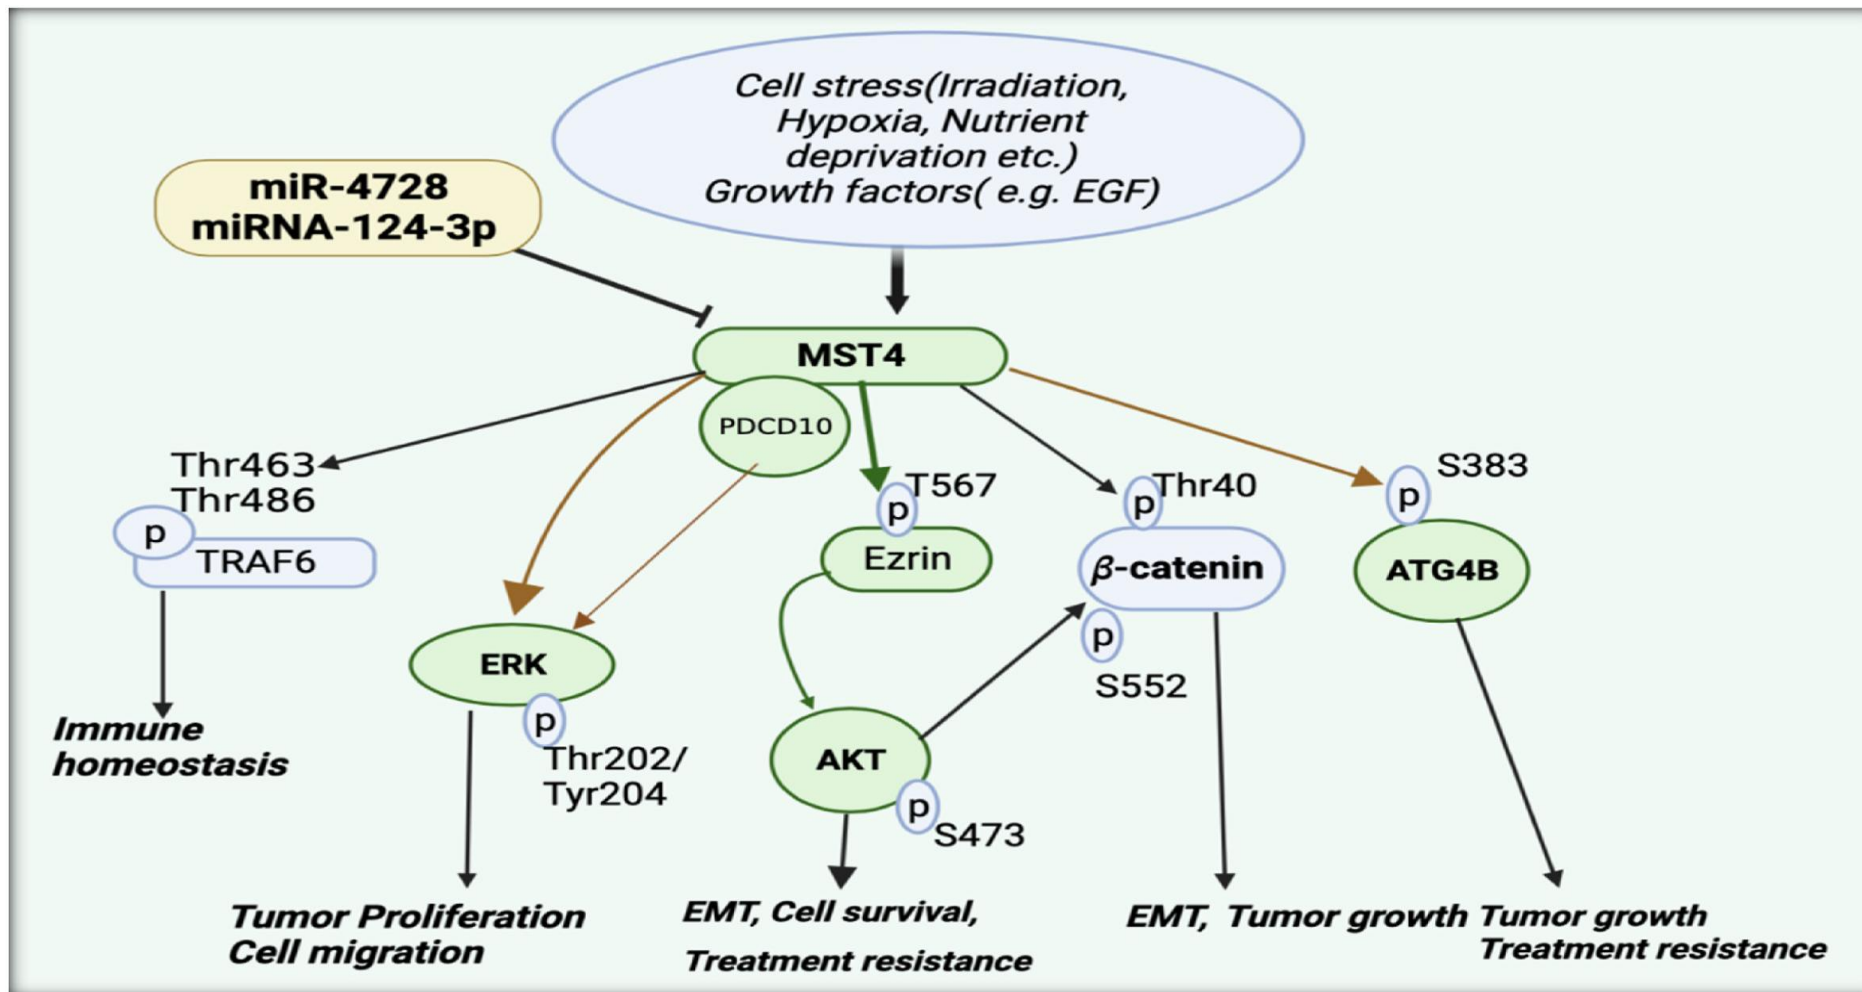

This is a picture of  
“Mechanisms of MST4-  
induced Tumor  
Progression and  
Treatment Resistance”

Please give a suitable  
interpretation of this  
picture

(Explanation from the original article)

**Mechanisms of MST4 induced tumor progression and treatment resistance.** Through the activation of several downstream signaling pathways, MST4 is contributing to tumor cell proliferation, promoting migration/invasion and metastasis of tumor cells with the activation of EMT associated molecules, and enhance tumor cell survival and resistance for therapeutics.

The image titled "Mechanisms of MST4-induced Tumor Progression and Treatment Resistance" appears to depict a complex molecular pathway involving various proteins, miRNAs, and signaling cascades that contribute to tumor progression and resistance to treatment. Here's a suitable interpretation of the key components and their interactions:

1. **Cell Stress:** Factors such as irradiation, hypoxia, and nutrient deprivation can induce cellular stress, leading to the activation of specific pathways that promote tumor progression.
2. **miR-4728 and miRNA-124-3p:** These microRNAs (miRNAs) are involved in regulating gene expression. They may play roles in modulating the activity of MST4 and other downstream effectors.
3. **MST4:** This is a serine/threonine kinase that appears to be central in the pathway. MST4 can be activated by growth factors like EGF and may phosphorylate various substrates, influencing tumor behavior.
4. **PDCD10:** This protein interacts with MST4 and may be involved in regulating cell survival and apoptosis.
5. **Phosphorylation Sites (Thr463, S383, Thr486, T567, Thr40) :** These sites on MST4 or other proteins are likely critical for their activation and function in the signaling pathway.
6. **TRAF6:** This protein is involved in NF- $\kappa$ B signaling and may contribute to inflammation and tumor progression.
7. **Ezrin and  $\beta$ -catenin:** These proteins are involved in cell adhesion, migration, and signaling, which are crucial for epithelial-mesenchymal transition (EMT) and tumor metastasis.
8. **ATG4B:** This protein is involved in autophagy, a process that can promote cell survival under stress conditions and contribute to treatment resistance.
9. **ERK and AKT:** These are key signaling kinases in the MAPK/ERK and PI3K/AKT pathways, respectively. They promote cell proliferation, survival, and resistance to apoptosis.
10. **Immune Homeostasis:** The pathway may also influence the immune response, potentially allowing tumors to evade immune detection.
11. **Tumor Proliferation, EMT, Cell Survival, Migration, and Treatment Resistance:** The overall outcome of these interactions is the promotion of tumor growth, metastasis, and resistance to therapeutic interventions.

In summary, the image illustrates how MST4, through its interactions with various proteins and signaling pathways, can drive tumor progression and confer resistance to treatments. Understanding these mechanisms could help in developing targeted therapies to disrupt these pathways and improve cancer treatment outcomes.

This diagram represents the signaling mechanisms by which **MST4 (Mammalian Sterile 20-like kinase 4)** contributes to **tumor progression and treatment resistance** under conditions of **cell stress** (e.g., irradiation, hypoxia, and nutrient deprivation) and **growth factors** like EGF.

### **Key Components and Their Roles:**

#### **1.MST4 Activation & Regulation:**

- MST4 is influenced by microRNAs (**miR-4728, miRNA-124-3p**), which may act as inhibitors.
- MST4 is activated under cell stress and growth factor stimulation.

#### **2.Downstream Pathways Mediated by MST4:**

##### **❑ Immune Homeostasis via TRAF6:**

- MST4 phosphorylates **TRAF6 (at Thr463, Thr486)**, influencing immune homeostasis.

##### **❑ Tumor Proliferation & Cell Migration via ERK Pathway:**

- MST4 activates **ERK (via phosphorylation at Thr202/Tyr204)**, promoting **tumor proliferation** and **cell migration**.

##### **❑ EMT (Epithelial-Mesenchymal Transition), Cell Survival & Treatment Resistance via AKT Pathway:**

- MST4 phosphorylates **Ezrin (T567)**, leading to **AKT activation (phosphorylation at S473)**.
- This contributes to **EMT, cell survival, and resistance to treatment**.

##### **❑ EMT & Tumor Growth via $\beta$ -catenin Pathway:**

- MST4 phosphorylates  **$\beta$ -catenin at Thr40**, and  $\beta$ -catenin is further phosphorylated at **S552**.
- This activation supports **EMT and tumor growth**.

##### **❑ Tumor Growth & Treatment Resistance via ATG4B Pathway:**

- MST4 phosphorylates **ATG4B at S383**, which is involved in **autophagy regulation**.
- This may contribute to **tumor growth and resistance to therapy**.

##### **❑ Biological Implications:**

- MST4 acts as a central regulator in multiple oncogenic pathways.
- It promotes **tumor proliferation, metastasis, EMT, and therapy resistance**.
- It influences immune responses via **TRAF6**, potentially affecting immune evasion by tumors.
- The involvement of  **$\beta$ -catenin and AKT** pathways suggests MST4 contributes to **aggressive cancer phenotypes**.
- The regulation by **miR-4728 and miRNA-124-3p** suggests potential therapeutic targets.

##### **❑ Clinical Relevance:**

- **Targeting MST4** or its downstream pathways (**ERK, AKT,  $\beta$ -catenin, and ATG4B**) may be a strategy to counteract **tumor progression and resistance to treatment**.
- The presence of **microRNAs** as regulatory elements provides potential **biomarkers or therapeutic interventions** for MST4-driven cancers.

This is a picture of “Metabolic reprogramming induced by genetic alterations and interactions with the tumor microenvironment in thyroid cancer”

Please give a suitable interpretation of this picture

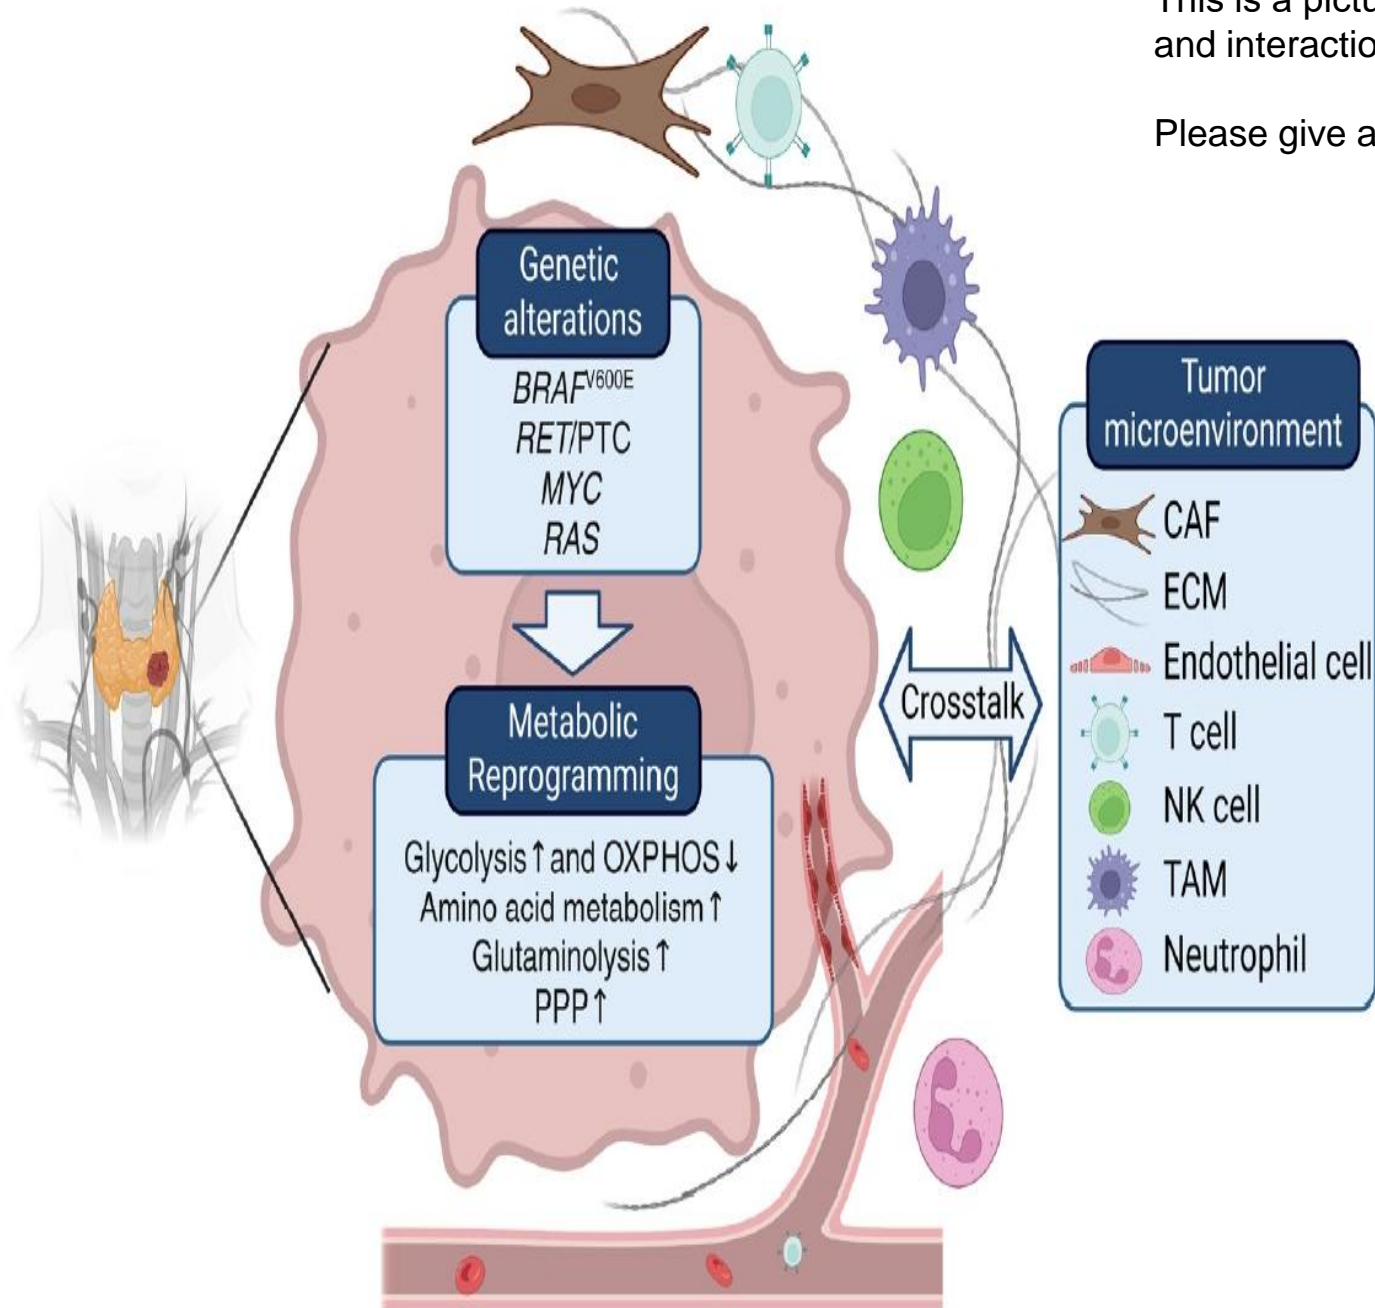

Metabolic reprogramming induced by genetic alterations and interactions with the tumor microenvironment in thyroid cancer. Thyroid cancer cells manifest distinct metabolic changes, such as elevated glycolysis (the Warburg effect) and alterations in crucial metabolic pathways, contributing to therapeutic resistance and oncogenic progression. These metabolic shifts are influenced by genetic alterations, including the *BRAFV600E* mutation, *RET*/papillary thyroid cancer (PTC) rearrangements, *MYC* overexpression, and *RAS* mutations.

The tumor microenvironment (TME), comprising diverse cellular components such as cancer-associated fibroblasts (CAFs), extracellular matrix (ECM), endothelial cells, and immune cells, plays a pivotal role in tumor progression and response to therapy.

A dynamic metabolic crosstalk within the TME is essential for tumor development. The metabolic reprogramming of immune cells significantly affects their anti-tumor activity.

Understanding these complex interactions is crucial for developing targeted cancer therapies. OXPHOS, oxidative phosphorylation; PPP, pentose phosphate pathway; NK, natural killer; TAM, tumor-associated macrophage

The image titled "Metabolic reprogramming induced by genetic alterations and interactions with the tumor microenvironment in thyroid cancer" likely illustrates the complex interplay between genetic mutations and the tumor microenvironment that leads to metabolic changes in thyroid cancer cells. Here's a breakdown of the key components:

1. **Genetic Alterations:** The presence of specific genetic mutations such as BRAFV600E, RET/PTC, MYC, and RAS can drive metabolic reprogramming in thyroid cancer cells. These mutations often lead to changes in cellular metabolism that support tumor growth and survival.
2. **Tumor Microenvironment:** The tumor microenvironment includes various cell types and extracellular components that interact with cancer cells. Key elements mentioned are Cancer-Associated Fibroblasts (CAF), Extracellular Matrix (ECM), Endothelial cells, Tumor-Associated Macrophages (TAM), T cells, Natural Killer (NK) cells, and Neutrophils. These components can influence the metabolic behavior of cancer cells through crosstalk.

3. **Metabolic Pathways:** The image highlights several metabolic pathways that are altered in thyroid cancer, including Glycolysis, Oxidative Phosphorylation (OXPHOS), Glutaminolysis, Amino Acid Metabolism, and the Pentose Phosphate Pathway (PPP). These pathways are often reprogrammed to meet the high energy and biosynthetic demands of rapidly dividing cancer cells.
4. **Crosstalk:** The interaction between cancer cells and the tumor microenvironment is crucial for metabolic reprogramming. This crosstalk can lead to the activation of specific metabolic pathways that promote tumor progression and immune evasion.

Overall, the image likely depicts how genetic mutations and the tumor microenvironment collaboratively drive metabolic changes in thyroid cancer, facilitating tumor growth, survival, and interaction with the immune system.

This image illustrates the metabolic reprogramming that occurs in thyroid cancer due to genetic alterations and interactions with the tumor microenvironment.

### Key Interpretation:

#### 1.Genetic Alterations Drive Metabolic Changes

- ❑ The diagram highlights key genetic mutations associated with thyroid cancer, such as **BRAFV600E, RET/PTC, MYC, and RAS**.
- ❑ These mutations contribute to **metabolic reprogramming**, a process where cancer cells alter their metabolism to support uncontrolled growth and survival.

#### 2.Metabolic Reprogramming in Thyroid Cancer

Tumor cells undergo metabolic shifts, including:

- ❑ **Increased glycolysis (↑)** – Enhancing glucose breakdown for rapid energy production.
- ❑ **Decreased oxidative phosphorylation (OXPHOS ↓)** – Reduced reliance on mitochondrial respiration.
- ❑ **Increased amino acid metabolism (↑)** – Supporting biosynthesis and cellular functions.
- ❑ **Upregulated glutaminolysis (↑)** – Providing alternative energy sources.
- ❑ **Enhanced pentose phosphate pathway (PPP ↑)** – Supporting nucleotide synthesis and antioxidant defense.

#### 3.Crosstalk with the Tumor Microenvironment (TME)

The tumor communicates with its **microenvironment**, which consists of various cells:

- ❑ **Cancer-associated fibroblasts (CAF)** – Supporting tumor growth and invasion.
- ❑ **Extracellular matrix (ECM)** – Providing structural support.
- ❑ **Endothelial cells** – Facilitating angiogenesis.
- ❑ **Immune cells:**
  - **T cells** – Can have either anti-tumor or immune-suppressive roles.
  - **Natural killer (NK) cells** – Cytotoxic to cancer cells.
  - **Tumor-associated macrophages (TAMs)** – Often promote cancer progression.
  - **Neutrophils** – Can contribute to tumor inflammation and immune suppression.

#### 4.Significance

- ❑ The metabolic reprogramming in thyroid cancer enhances tumor survival, proliferation, and resistance to therapy.
- ❑ Interaction with the **tumor microenvironment** creates a supportive niche, influencing immune evasion and angiogenesis.
- ❑ Understanding these processes is crucial for **developing targeted therapies** aimed at metabolic vulnerabilities in thyroid cancer.

#### Conclusion:

This diagram provides an insightful overview of how genetic mutations drive metabolic changes in thyroid cancer and how these metabolic shifts interact with the surrounding tumor microenvironment. This understanding helps in **identifying potential therapeutic targets** for better treatment strategies.



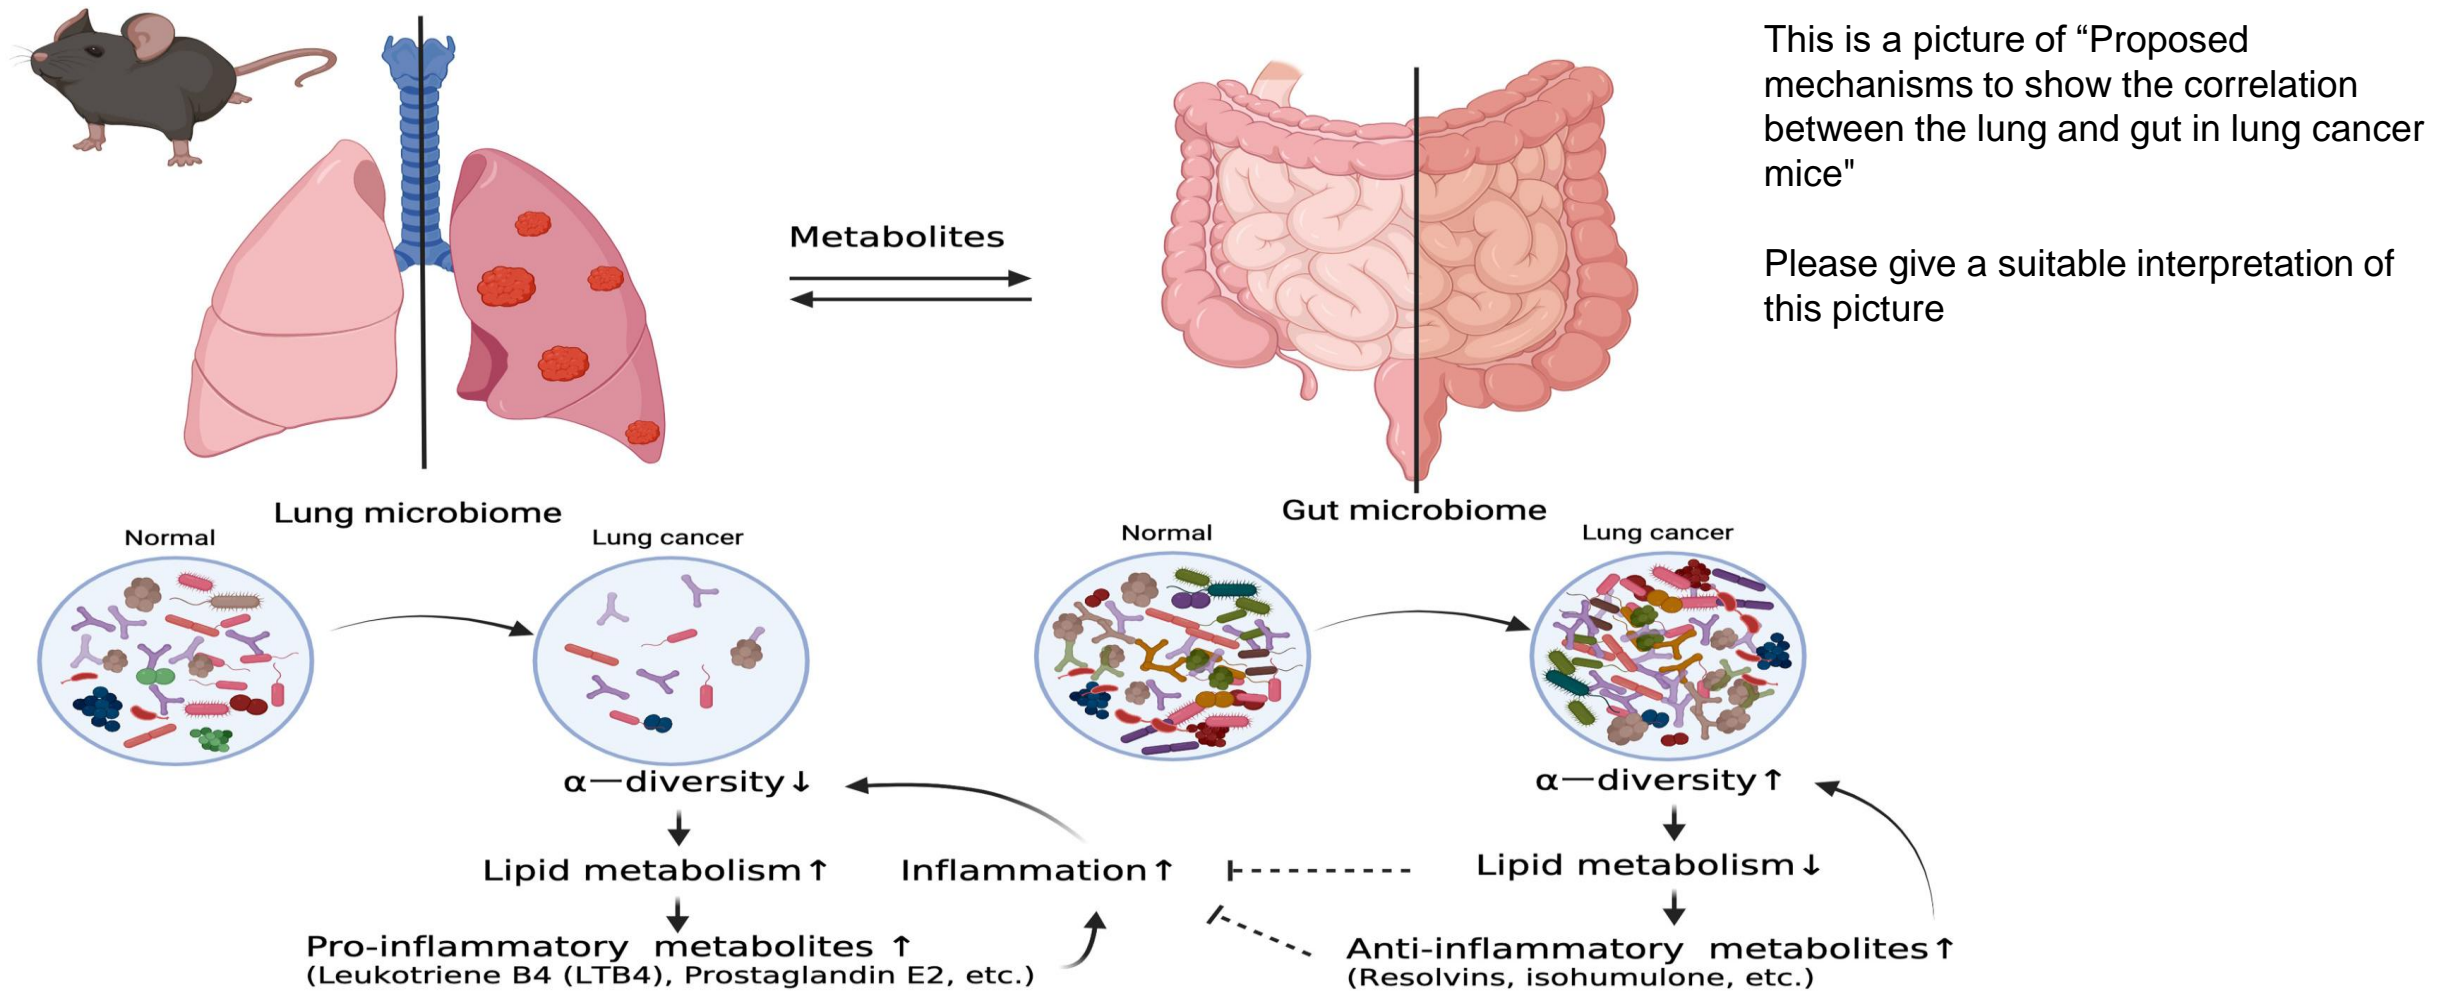

Lung cancer induces inflammation and changes in the microbiome. These factors promote lipid metabolism in the lungs. Additionally, lung cancer upregulates  $\omega$ -6 polyunsaturated fatty acids (PUFAs) (adrenic acid), pro-inflammatory lipid mediators, and their sources, long-chain fatty acids, such as oleic, palmitic, and stearic acids, to promote lung cancer progression. However, the gut decreases the production of these metabolites, thereby reducing their supply to the lungs. Instead, the gut upregulates anti-inflammatory lipid metabolites, such as resolvins. Alterations in lipid metabolism can also affect the gut microbiome

The image titled "Proposed mechanisms to show the correlation between the lung and gut in lung cancer mice" illustrates the interplay between the lung and gut microbiomes and their metabolic activities in the context of lung cancer progression. Here's a suitable interpretation:

#### 1. Microbiome Diversity:

- Lung Microbiome: In normal conditions, the lung microbiome exhibits higher  $\alpha$ -diversity, which decreases in lung cancer conditions.
- Gut Microbiome: Conversely, the gut microbiome shows an increase in  $\alpha$ -diversity during lung cancer.

#### 2. Metabolic Changes:

- Lipid Metabolism: There is an upregulation of lipid metabolism in the lung microbiome during lung cancer, while it is downregulated in the gut microbiome.
- Inflammation: Inflammation increases in the lung microbiome during lung cancer.

#### 3. Metabolites:

- Pro-inflammatory Metabolites: These metabolites, such as Leukotriene B4 (LTB4) and Prostaglandin E2, are elevated in lung cancer conditions, contributing to inflammation.
- Anti-inflammatory Metabolites: Metabolites like Resolvins and isohumulone, which have anti-inflammatory properties, are also increased, possibly as a counter-response to the inflammation.

The image suggests a complex interaction between the lung and gut microbiomes, where changes in one can influence the other, particularly in the context of lung cancer. The balance between pro-inflammatory and anti-inflammatory metabolites plays a crucial role in the progression of the disease. This highlights the importance of considering both local and systemic microbial environments in understanding and potentially treating lung cancer.

## Interpretation of the Image:

### Correlation Between Lung and Gut Microbiomes in Lung Cancer Mice

This image presents a proposed mechanism illustrating how the **lung microbiome** and **gut microbiome** interact and influence lung cancer progression in mice. The primary factors under consideration include **microbial diversity ( $\alpha$ -diversity)**, **lipid metabolism**, and **inflammatory mediators**.

## Key Findings & Mechanisms:

### 1. Lung Microbiome Changes in Lung Cancer:

- ☐ In normal conditions, the lung microbiome is diverse, with different types of bacteria present.
- ☐ In lung cancer,  **$\alpha$ -diversity decreases**, meaning microbial variety is reduced.
- ☐ This leads to **increased lipid metabolism**, which further promotes the production of **pro-inflammatory metabolites** such as:
  - **Leukotriene B4 (LTB4)**
  - **Prostaglandin E2**
- ☐ These pro-inflammatory metabolites contribute to **higher inflammation**, which may promote tumor progression.

### 2. Gut Microbiome Changes in Lung Cancer:

- ☐ In contrast to the lung microbiome, lung cancer leads to an **increase in gut microbiome  $\alpha$ -diversity** (greater microbial variety).
- ☐ This results in **reduced lipid metabolism** and an increase in **anti-inflammatory metabolites**, including:
  - **Resolvins**
  - **Isohumulone**
- ☐ These compounds have an **anti-inflammatory** effect, possibly counteracting inflammation induced by lung microbiome changes.

### 3. Metabolite Exchange Between Lung and Gut:

- ☐ The bidirectional exchange of **metabolites** between the lung and gut is highlighted, suggesting a **systemic influence of gut microbiota on lung health**.
- ☐ The gut microbiome may **produce anti-inflammatory metabolites** that could potentially mitigate the inflammatory effects in the lung.

## Overall Implications:

- **Microbiome alterations** in both the lung and gut contribute to lung cancer progression.
- While the **lung microbiome becomes less diverse and promotes inflammation**, the **gut microbiome increases in diversity and produces anti-inflammatory metabolites**.
- The interaction between the gut and lung microbiomes through metabolite exchange suggests that **modulating gut bacteria** could be a potential therapeutic approach for lung cancer.

This diagram provides an insightful overview of how gut-lung microbial interactions may influence **inflammation, lipid metabolism, and lung cancer progression** in mice.

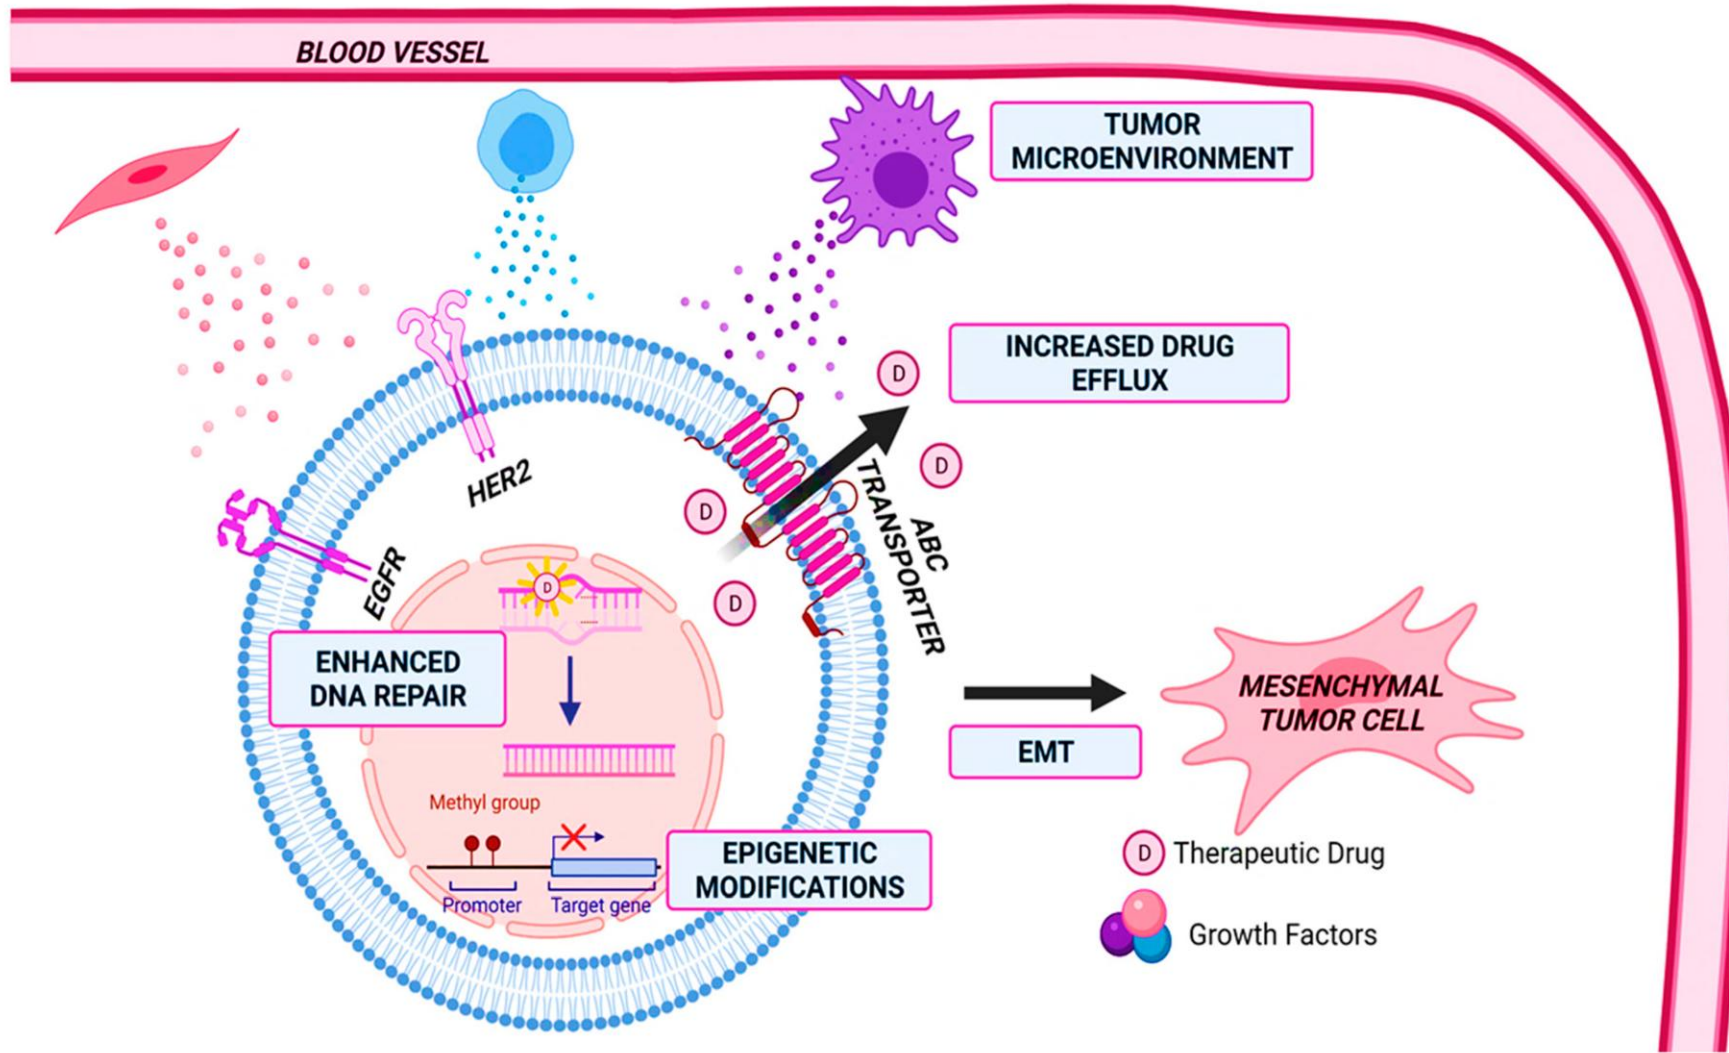

This is a picture of  
“Mechanisms of drugs  
resistance in breast  
cancer”

Please give a suitable  
interpretation of this  
picture

Mechanisms of drug resistance in breast cancer. These mechanisms include changes in the tumor microenvironment, enhanced DNA repair, epigenetic modifications, epithelial-to-mesenchymal transition (EMT), and increased drug efflux. There are several mechanisms of resistance in BC. This includes increased drug efflux, enhanced DNA repair, senescence escape, epigenetic modifications, tumor heterogeneity, TME, and epithelial-to-mesenchymal transition (EMT)

The image titled "Mechanisms of Drug Resistance in Breast Cancer" highlights key processes that enable cancer cells to evade treatment. Here's a structured interpretation of the terms provided:

**1. Blood Vessel:**

Abnormal tumor vasculature can impair drug delivery. Poor blood flow or leaky vessels may reduce the effective concentration of therapeutics reaching cancer cells, limiting treatment efficacy.

**2. Tumor Microenvironment:**

The surrounding stromal cells (e.g., fibroblasts, immune cells) and extracellular matrix create a protective niche. This microenvironment may secrete survival signals, suppress immune attacks, or physically block drug penetration.

**3. Increased Drug Efflux:**

Cancer cells overexpress efflux pumps (e.g., P-glycoprotein) to actively expel chemotherapeutic agents, lowering intracellular drug levels and diminishing their cytotoxic effects.

**4. Enhanced DNA Repair** (likely interpretation of "Dale Deraur" as a typo):

Tumors may upregulate DNA repair mechanisms (e.g., BRCA mutations or PARP pathways) to counteract DNA damage induced by therapies like chemotherapy or radiation, promoting survival.

**5. Mesenchymal** (Epithelial-Mesenchymal Transition, EMT):

EMT allows cancer cells to adopt a more invasive, stem-like state. Mesenchymal cells are often resistant to apoptosis, targeted therapies, and immune detection, facilitating recurrence and metastasis.

**Overall Message:** The image underscores that drug resistance in breast cancer is multifactorial, involving structural barriers (blood vessels), cellular adaptations (efflux pumps, EMT), microenvironmental interactions, and molecular repair mechanisms. Addressing these pathways collectively is critical to overcoming treatment resistance.

This image provides a visual representation of the **mechanisms of drug resistance in breast cancer**, highlighting several cellular and molecular processes that contribute to tumor cell survival despite therapeutic interventions.

### Key Features and Interpretation:

#### 1. Tumor Microenvironment Influence

- The presence of **growth factors** from the tumor microenvironment influences cancer cell behavior and survival.
- These external signals activate receptors such as **EGFR (Epidermal Growth Factor Receptor)** and **HER2**, promoting intracellular signaling that enhances tumor cell resistance.

#### 2. Increased Drug Efflux via ABC Transporters

- The **ABC transporter** (ATP-binding cassette transporter) actively **pumps out therapeutic drugs** (labeled as “D”) from the cancer cell, reducing drug efficacy.
- This prevents the accumulation of cytotoxic agents, allowing the tumor cell to evade treatment.

#### 3. Enhanced DNA Repair Mechanisms

- Cancer cells develop an improved ability to repair DNA damage induced by chemotherapy.
- This prevents apoptosis (programmed cell death) and allows the cells to **survive drug-induced genotoxic stress**.

#### 4. Epigenetic Modifications

- The image highlights **epigenetic alterations**, such as DNA methylation, that can **silence tumor suppressor genes**.
- This enables cancer cells to bypass regulatory checkpoints and continue proliferating despite drug treatment.

#### 5. Epithelial-Mesenchymal Transition (EMT) & Tumor Progression

- The **EMT process** is indicated, leading to the formation of **mesenchymal tumor cells**.
- This transformation increases cancer cell motility, invasion, and metastasis, making the disease more aggressive and resistant to treatment.

### Overall Implications:

- Drug resistance in breast cancer arises due to multiple **cellular adaptations**, including **drug efflux**, **enhanced DNA repair**, **epigenetic modifications**, and **microenvironmental influences**.
- These mechanisms collectively **diminish treatment effectiveness**, contributing to cancer recurrence and progression.

This illustration underscores the **complexity of drug resistance** in breast cancer and the need for **targeted therapeutic strategies** to overcome these challenges.
